# Supplementary material for: Comparative Rice Bran Metabolomics across Diverse Cultivars and Functional Rice Gene-Bran Metabolite Relationships
Source: Preprints.org preprint supplement (doi:10.20944/preprints201809.0274.v1), 2018-09-15
Supplement: Supplementary file 1 [file Supplementary Table 1 & 2.xlsx]

## Sheet: Supplementary Table 1
Supplementary Table 1. Relative abundances of all metabolites
SUPER_PATHWAY	SUB_PATHWAY	Metabolite	Ritention Index	MASS	KEGG ID	HMDB ID	PUBCHEM ID	CHEMSPIDER ID	Kenya- Basmati 217	Kenya - Basmati 370	Mali - Gambiaka	Mali - Shwetasoke	Mali - DM-16	Mali - Khao Gaew	Nicaragua - Dorado	Nepal – Sawa Mahsuli	India - Chennula	India - Njavara	USA - Calrose	USA - RBT300	USA - Jasmine 85	USA - IAC 600	USA – LTH	USA – SHZ-2	Cambodia - Rang Jey
Amino acid	Amines and polyamines	agmatine	3057	131.129	C00179	HMDB01432	199	194	676985	461688	1442805	945626	1668272	1.64017e+06	705426	2.93961e+06	302890	248186	5178900	9224455	790833	847565	4787258	1.55588e+06	7389310
		feruloylputrescine	2862	265.155	C10497		5281796	4445108	2310427	1922981	2492245	1014791	5.72976e+06	1932760	1899438	2510236	4022201	647311	4063935	5829131	4.89025e+06	688421	2803921	1101262	1255314
		N-acetylputrescine	2230	131.118	C02714	HMDB02064	122356	109095	318464	.	258031	.	483165	.	683169	558744	134546	.	1027313	760483	.	.	1436735	.	601604
		nicotianamine	1800	304.15	C05324		9882882	8058557	7053611	8885942	4373391	4722153	2587047	2925667	2576087	3722342	1567297	2274780	6419562	12725095	4762900	2493467	6320569	3162261	2209997
		putrescine	3027	89.1073	C00134	HMDB01414	1045	13837702	522027	382004	945821	629231	722446	1415825	.	273713	663862	.	274613	2.89822e+06	297770	919350	1.71798e+06	387510	583909
		spermidine	3355	146.165	C00315	HMDB01257	1102	1071	364343	.	6151458	651100	.	20784114	366938	.	3578863	8714565	.	30302152	.	1492800	4001966	.	.
	Aromatic amino acid metabolism (PEP derived)	2-oxindole-3-acetate	2076	190.051		HMDB35514	3080590	2338343	68999	62096	78596	200897	110436	46749	160436	92080	114099	71958	131557	187332	.	38543	45305	71281	83193
		indole-3-carboxylic acid	1710	160.04	C19837	HMDB03320	69867	.	193699	197652	185606	150061	94265	51171	323706	290218	65789	111815	303607	211939	95286	103117	62220	193279	495190
		indoleacetate	2850	176.071	C00954	HMDB00197	802	780	2647969	1727748	3069288	1685753	1066316	3.82781e+06	3.18181e+06	1863577	1.59014e+06	1277153	961162	1399141	884470	930517	1384601	1481284	977653
		3-(4-hydroxyphenyl)lactate	1379	181.051	C03672	HMDB00755	9378	9010	160155	181735	156270	128462	151854	77504	361423	288993	115729	303441	214454	135920	127731	379881	437828	173486	502961
		indolelactate	2286	204.067	C02043	HMDB00671	92904	83867	48378	48139	.	31621	61074	.	117300	58404	27900	122963	.	32712	19334	320704	.	.	65080
		kynurenate	2224	188.035	C01717	HMDB00715	3845	3712	319673	153364	5607747	4170814	160638	192032	260499	396609	250368	287261	130137	107736	1257844	374411	62666	321001	2201321
		N-acetylphenylalanine	2597	206.082	C03519	HMDB00512	74839	67404	67390	94525	64287	78401	80467	.	247956	83968	.	60012	140260	282524	61767	38693	107870	76494	139638
		N-acetyltryptophan	2630	245.093	C03137	HMDB13713	700653	610602	93545	69396	37131	37145	42536	.	70577	19725	.	.	33290	238359	.	.	38154	39193	75052
		N-acetyltyrosine	1680	222.077		HMDB00866	68310	61606	76128	91753	53768	59283	49760	.	198417	67854	.	67782	114223	238536	57034	43569	99904	55330	62126
		N-formylphenylalanine	2360	192.067			759256	663938	27200	73965	56300	101701	.	32890	59312	64961	.	.	259941	77859	73473	.	.	34674	259928
		O-sulfo-L-tyrosine	990	260.023			514186	448617	150613	132441	140799	168317	133448	101500	207199	132603	79674	33294	347887	277360	335959	261363	313754	287831	135792
		phenylalanine	2878	166.086	C00079	HMDB00159	6140	5910	56838256	48305008	117369536	89140688	160754992	41318416	114557376	139501024	36322756	32452500	149156144	97895184	110359568	63897612	130395440	132558032	32485258
		phenyllactate (PLA)	2208	165.056	C05607	HMDB00779	3848	3715	202311	207250	.	.	.	248612	241317	184565	.	254106	167573	124813	105855	132383	108360	242568	1440110
		quinate	2432.9	191.056	C00296	HMDB03072	6508	10246715	3.89322e+06	4150503	2260968	3985257	1142348	2633461	3583780	1911199	2921584	6434956	7.22052e+06	6635649	2444531	3.80174e+06	2908282	1943737	4328661
		serotonin	2550	177.102	C00780	HMDB00259	5202	5013	5770857	5036164	7077053	6105525	35530308	5085397	2292595	1.57205e+06	3101841	927570	6992910	11446251	2945806	14328996	8748835	6149616	5041412
		shikimate	2725	173.046	C00493	HMDB03070	8742	8412	481048	426700	353239	610529	214662	323886	435183	379176	226292	195401	1209216	766628	657698	132866	235457	400203	409372
		tryptamine	3062	161.107	C00398	HMDB00303	1150	1118	183815	510936	1419468	161573	1260563	.	361162	702034	172482	.	1211969	1169285	135085	285020	732616	242404	446890
		tryptophan	2986	205.097	C00078	HMDB00929	6305	6066	209231712	181534928	140488496	210653280	192527424	51804076	182050944	115896816	104803640	54010360	200567216	231541904	97205792	165638576	211261456	181382288	45222620
		tyramine	2540	138.091	C00483	HMDB00306	5610	5408	324888	648496	404424	349966	415842	.	.	314621	493664	342643	124921	161108	322220	645460	927999	404144	737891
		tyrosine	2430	182.081	C00082	HMDB00158	6057	5833	67334832	61602108	101447360	93218064	102932128	42069940	103661912	96750712	41283808	43261756	114319592	98871280	90334456	71379616	114007312	111525944	21809576
	Aspartate family (OAA derived)	2-aminoadipate	3500	160.061	C00956	HMDB00510	469	456	229090	233911	172077	263483	294725	130471	251403	301211	117822	.	435794	523902	277227	369171	273050	210902	.
		2-hydroxyadipate	3000	161.046	C02360	HMDB00321	193530	167943	2.08626e+06	639702	823877	1987344	945092	632486	620940	1678623	1723949	734265	2229492	686297	1014070	1188101	993813	1448972	591877
		2-methylcitrate/homocitrate	575	205.035			.	.	2077239	2255271	2502285	3354531	2629434	1.2135e+06	2026244	3248630	1.63526e+06	1036919	4493396	2457961	2206040	1695226	1740676	2613906	2304763
		2-oxoadipate	611.7	159.03	C00322	HMDB00225	71	70	196345	270508	159166	253006	241922	106491	275932	103984	143526	84107	335364	271789	92830	227503	187910	223219	291238
		3-sulfo-L-alanine	570	170.012	C00506	HMDB02757	72886	65718	797217	919929	355831	541693	366134	175496	385383	580523	289739	119774	1124432	872701	629141	133592	419111	546149	516098
		6-oxopiperidine-2-carboxylate	964.5	142.051		HMDB61705	3014237	2282737	466352	581603	540896	537255	361166	266663	1065700	333235	424186	507470	671697	611315	412658	346377	311843	353920	1112611
		alanine	1700	90.055	C00041	HMDB00161	5950	5735	223098128	233936880	198019584	219347248	262096640	103205584	224781776	428233920	80635416	67612960	428685984	473382528	179213472	504331328	225555680	210773856	68343496
		asparagine	1225	133.061	C00152	HMDB00168	6267	6031	1252176896	1167184384	3218893312	2380749312	1199769600	830019328	838777344	1434855552	585201984	203707952	1793512960	1183287296	1153978240	568423552	975139712	1660722560	410445952
		aspartate	1165	134.045	C00049	HMDB00191	5960	5745	265292528	225796288	362441696	453000000	965248064	304054592	217760864	398854176	161213776	86296672	881992128	744590592	535856832	43524592	537825728	517705024	140709728
		lysine	2850	147.113	C00047	HMDB00182	5962	5747	48612648	39205176	79409624	56621744	72085960	35134648	64943396	77076704	22545660	44460208	66382272	69141936	54758376	37475400	47126264	85837840	33786912
		methionine	2526	150.058	C00073	HMDB00696	6137	5907	45915000	26876488	48993908	39259220	71113968	30620924	39591844	38798444	12740365	12177964	66074060	57404508	23555900	34221816	95838936	34056452	10856948
		methionine sulfone	1250	182.048			69961	63154	1285386	924616	3.59357e+06	11319773	587020	477582	424386	1284037	1293560	475059	2107849	1.37571e+06	3195873	161827	922996	3.05265e+06	620364
		methionine sulfoxide	1272	166.053	C02989	HMDB02005	158980	139840	13658252	17108360	14374609	14571598	21002016	4480076	19780008	38897200	15610158	20189382	43597480	20186080	33325036	11104995	42201544	43595532	16599754
		N6,N6,N6-trimethyllysine	2825	189.16	C03793	HMDB01325	440120	140379	23109100	13395517	12619973	11663740	18335584	7439688	9571500	19203452	1.92398e+06	4687949	59011620	45854544	10710545	14207967	9346512	15791085	6.47459e+06
		N6-acetyllysine	1059	187.109	C02727	HMDB00206	92832	83801	33953	.	62350	.	102418	.	81719	32385	.	.	75669	49343	47114	.	70682	89431	.
		N-acetylalanine	1564.8	130.051	C02847	HMDB00766	88064	79449	1153923	1260937	1639290	2480879	1102362	576866	832481	1502884	751160	842479	1697487	3.85534e+06	750412	562678	842668	413477	867950
		N-acetylasparagine	785	175.071		HMDB06028	99715	90090	2141935	2311692	2541603	2083617	556819	574167	1194530	1688085	653536	598796	2709501	7138298	1153888	388031	1049030	926131	2049360
		N-acetylaspartate (NAA)	620.5	174.041	C01042	HMDB00812	65065	58576	233608	326767	204471	267413	143848	66809	347331	221544	127345	163497	352763	431018	243707	110647	212685	296309	302468
		N-acetylmethionine	1787	190.054	C02712	HMDB11745	448580	395338	29059	16273	197794	90215	144923	62524	64376	93691	.	.	67006	110163	40810	23216	51994	57526	.
		pipecolate	2200	130.086	C00408	HMDB00070	849	826	37628712	20242240	39577068	30108846	59540772	15255125	39451628	103796544	13261935	9995707	39397840	37498388	10147390	19145928	30553214	15529846	48278632
		saccharopine	2530	277.139	C00449	HMDB00279	160556	141086	4065913	2699322	1880925	4.08486e+06	21207170	4785776	4418170	4146904	3253535	316157	5589110	5511304	2.09394e+06	5747927	2686871	3618360	1361599
		S-adenosylhomocysteine (SAH)	1832.4	383.114	C00021	HMDB00939	439155	16788012	259684	198218	222534	157188	152894	142882	316775	215304	61864	48001	283370	265989	114851	387431	113744	140313	41711
		threonine	1514	120.066	C00188	HMDB00167	6288	6051	75412432	57856872	73792240	76350344	82007272	30312176	81891952	119024168	22938162	31794126	90644624	92107976	74188592	60685060	86745016	68429208	28348336
	Branched Chain Amino Acids (OAA derived)	isoleucine	2800	132.102	C00407	HMDB00172	6306	769	176140032	114291392	133054720	195970848	200424832	69068776	150689936	245014032	57758604	60546892	156326016	165842896	134625360	68357912	153190144	164128704	46420816
	Branched Chain Amino Acids (pyruvate derived)	2,3-dihydroxyisovalerate	1050	133.051	C04039	HMDB12141	677	657	306502	336862	214568	801301	345918	210843	1289046	744973	795653	394941	621137	598620	575219	530962	474156	473356	564554
		2-hydroxy-3-methylvalerate	1800	131.071		HMDB00317	164623	144317	163352	148482	92046	188800	50111	.	229911	153047	129691	71924	.	123748	111392	107520	58247	114632	104610
		2-isopropylmalate	2605	175.061	C02504	HMDB00402	77	76	78098	453117	168984	360399	136093	.	1276056	382466	324353	685739	269727	389788	.	377687	443430	87632	975144
		3-methylglutaconate	2700	143.035		HMDB00522	1551553	1267861	349120	246918	161966	392974	260706	130778	217793	260545	200536	303521	542411	287623	426033	250350	198215	209436	282341
		alpha-hydroxyisovalerate	1052	117.056		HMDB00407	99823	90190	140653	366382	206387	364654	361359	235683	.	416496	405445	172169	169721	157711	297151	340144	488243	584457	188006
		beta-hydroxyisovalerate	1149.8	117.056		HMDB00754	69362	62571	282318	529757	286538	127572	296726	355616	418958	259715	423900	228728	456445	796573	479581	445426	256537	472374	101541
		leucine	2864	132.102	C00123	HMDB00687	6106	5880	67000328	52571296	99497504	98497064	182371216	41803256	96051568	139500000	29940896	38540816	100944216	89348824	106203632	65913564	92455560	107672216	25104608
		methylsuccinate	2800	131.035		HMDB01844	10349	9922	7270307	4750190	5024142	7295474	3164061	3584799	2836952	1677433	1375580	919386	9397425	5.30125e+06	5263604	2419712	6607511	2895172	4677613
		N-acetylisoleucine	2325	172.098		HMDB61684	2802421	2081100	93885	88362	64224	82844	65804	.	135096	91921	.	59595	91370	276320	62544	24343	63852	78719	81740
		N-acetylleucine	2400	172.098	C02710	HMDB11756	70912	64075	62727	77995	41438	64724	102974	.	122820	48436	.	63448	93260	248209	.	.	54626	43452	77540
		N-acetylvaline	1704	158.082		HMDB11757	66789	60154	75576	78344	64672	97871	69331	.	136936	61277	.	55782	101641	258577	32589	33722	86174	72798	83674
		valine	909.4	116.072	C00183	HMDB00883	6287	6050	1127982	859195	1655907	1486377	1.7163e+06	775014	1885441	1815194	490476	433569	2151106	1604102	1588521	1018744	1496413	2340012	431339
	Glutamate family (alpha-ketoglutarate derived)	1-methylguanidine	2149	74.0713	C02294	HMDB01522	10111	28576	509568	654183	445739	659866	394881	225000	508861	576914	508982	703640	664133	582178	929197	485000	702879	915089	506792
		3-methylhistidine	2670	170.092	C01152	HMDB00479	64969	58494	16324719	14593723	10295094	15811442	6.75835e+06	5895728	5763072	11259558	2651153	1383888	13284945	15383608	12010447	7912024	10176972	9828060	2562142
		4-acetamidobutanoate	1350	146.081	C02946	HMDB03681	18189	17180	8304719	8975412	3857019	3549984	3615766	2804590	6263597	5513053	3577087	1835368	4896266	3642093	9537131	9072851	4256022	2130542	9080374
		4-guanidinobutanoate	2320	146.092	C01035	HMDB03464	500	486	289970496	254434976	315493184	449085280	358966592	161126528	531061664	481665568	268255872	184063120	236650160	212124592	362044096	245943664	298553504	511874112	211076272
		4-hydroxyglutamate	1141	164.055	C03079	HMDB01344	439902	388936	158690	670117	824004	1120234	719643	541651	560057	812414	351970	124941	850851	1080029	685228	562438	451019	476565	299204
		4-imidazoleacetate	2055	127.05	C02835	HMDB02024	96215	86856	6286188	4364645	7168022	8816888	8684405	4410551	9877349	12135789	6135555	4170981	13194877	11224338	6072254	5831118	8363402	9227656	9316920
		arginine	2825	175.119	C00062	HMDB00517	232	227	298707200	219213088	611495232	385726240	409020992	165006032	292660096	425155136	123494808	208179376	724674624	655881472	296020896	261837648	312918080	525709984	282899136
		beta-guanidinopropanoate	2145	132.077	C03065	HMDB13222	67701	61020	1721395	1649514	5485677	6104710	3089930	2799035	5285781	5313013	2732668	1788145	4011145	4651289	1680028	864683	2919191	5802511	1477867
		carboxyethyl-GABA	2085	176.092		HMDB02201	2572	2474	29377768	27180156	14043176	16585323	30500554	8783957	19952808	20473968	7.94379e+06	5691345	28162368	24522018	7684431	11954346	23202282	19516592	4825505
		dimethylarginine (SDMA + ADMA)	2850	203.15	C03626	HMDB01539	123831	110375	15920034	11321733	21583660	15762352	20947620	5856159	9363507	20605046	4225794	5524215	52317768	58070832	13913424	14743750	13427619	32438424	7000209
		ergothioneine	850	230.096	C05570	HMDB03045	3032311	2297320	4014698	3700877	10437583	5311705	7043809	2418771	2236001	3327419	.	.	365111	1435111	1025949	1045960	573380	1411406	552769
		gamma-aminobutyrate (GABA)	2048	104.071	C00334	HMDB00112	119	116	71638448	102985232	118468240	232279056	420225088	81877224	99456656	331182624	204420016	57099304	463292768	197870208	143994736	324034208	366814368	239582464	105533576
		glutamate	1500	148.06	C00025	HMDB00148	611	591	1166477056	1006160640	1613274112	1634949504	1508453760	654600448	586456384	1046766784	422123616	137707616	2044110464	2471015936	1570527232	596282432	1145883776	1480011008	411867392
		glutamate, gamma-methyl ester	2170	162.076		HMDB61715	68662	66546	2369616	3005486	3470153	6291438	2592474	1206282	484395	823393	481406	.	2969924	1505383	3218649	2143760	1017730	4528485	1144528
		glutamine	1291	147.076	C00064	HMDB00641	5961	5746	17336488	12685894	630372288	110468368	190015776	53721536	20887518	64583088	14190547	2295270	150159312	130737136	47962824	16103153	47032312	67402512	7024076
		guanidinoacetate	1937	118.061	C00581	HMDB00128	763	743	5907510	4993252	3865101	5184138	5530698	2801975	6.34657e+06	4808639	2418408	1157753	6.65792e+06	8330107	5954924	4353963	4890332	6.72956e+06	2.02213e+06
		histidine	755.9	154.062	C00135	HMDB00177	6274	752	3827579	2491638	4267518	3742379	5141130	2611466	5069891	3361667	1456962	1895970	6377012	10256087	2741372	5016282	4892196	6608768	2964824
		homocitrulline	1908	190.119	C02427	HMDB00679	65072	58582	3472989	3.4461e+06	3.14315e+06	4208948	2929686	1564813	1057476	2478725	921372	.	3163496	3000435	3488044	2043269	1.60182e+06	3921634	595336
		imidazole lactate	2040	157.061	C05568	HMDB02320	440129	389128	196169	248873	582565	431796	1.01446e+06	251614	1266037	2773365	744528	352853	1280349	1213655	914444	2375016	800393	671418	1059864
		N-acetylglutamate	1050	190.071	C00624	HMDB01138	70914	1266066	14294609	16258529	3055380	8846713	5637346	8626119	47566896	11317641	38441456	75956040	5.56813e+06	11646052	5720317	8700267	3577556	2241320	24566696
		N-acetylglutamine	845	189.087	C02716	HMDB06029	182230	158492	1401371	1806769	3019721	5810435	2892578	1418843	3288397	6950876	936989	1155976	2815690	2814241	1516082	1255070	2.08101e+06	1765028	1294194
		N-acetylhistidine	2065	198.087	C02997	HMDB32055	75619	68142	45994652	31047804	9242097	7874536	1952185	1225476	32627364	13781621	4549697	3972149	20355004	26369978	4291243	6242710	92109488	10135869	3442830
		N-acetylproline	1695	158.081			322640	285677	3309000	3528279	3346316	2051891	1902605	1038809	2209286	3152697	1492720	5576765	1844110	1413295	2278545	1.60505e+06	2039158	2167702	3157164
		N-alpha-acetylornithine	2000	175.108	C00437	HMDB03357	439232	388369	326770	317747	194017	231350	162269	.	898976	.	184985	170026	1019960	1153458	276934	232548	146658	107276	429128
		N-delta-acetylornithine	1877	175.108			9920500	8096135	9644990	11047793	3076726	6861272	4244144	1544803	1601938	1864903	16587489	1128227	6030691	2786941	1674817	836530	1615472	1919115	1109227
		N-methylproline	1335	130.086			557	541	2551340	2498260	41630644	4666625	3.80355e+06	2517095	2746283	4.16096e+06	2907182	1678342	4847983	3790515	3195637	3649973	5597207	3715472	1590550
		N-monomethylarginine	2845	189.135	C03884	HMDB29416	132862	117259	6.04531e+06	7396046	12218104	10973472	11105788	3.28116e+06	3.92635e+06	11306902	3.11768e+06	3.84801e+06	36579336	45159196	8771898	9304580	18423442	21722888	3.21195e+06
		proline	1603	116.071	C00148	HMDB00162	145742	128566	200468944	141663744	548336512	247225200	310001216	146064400	235285760	496699904	94186904	87939760	398522112	480261632	170905824	197424112	465433792	216728736	81708584
		pyroglutamine*	1900	129.066			134508	118562	46973324	49420236	68943656	69777112	54641940	36347228	32357536	34458796	13314860	7658043	44493696	60875060	28877084	25543888	31859440	71573072	18558338
		stachydrine	1440	144.102	C10172	HMDB04827	115244	103115	89689800	104622960	921223040	134832384	113659328	68985000	190318112	190233088	38284128	43179760	65217612	120361896	151958640	93257160	120756032	103474648	48473288
		trans-4-hydroxyproline	1064	132.065	C01157	HMDB00725	5810	5605	11276640	8190548	34747404	24893316	8709639	8155702	16844184	17575404	9954920	12747174	10591768	12677038	12696474	13842073	12726527	12121321	9195509
	Glutathione metabolism	4-hydroxy-nonenal-glutathione	3319.2	462.192			.	.	10145	.	211629	212895	289812	181603	.	.	.	.	659070	38590	74626	.	57405	561373	.
		5-oxoproline	1044	130.05	C01879	HMDB00267	7405	7127	82870552	108006344	142469360	62176176	50880968	23229084	83998504	56682180	40098640	54017496	44131836	91233928	30887332	74477168	54138712	39974872	94581512
		cysteine-glutathione disulfide	2465	427.095		HMDB00656	4247235	3455404	1443271	716779	1211411	1.72042e+06	2105484	400459	793160	1474999	694954	.	319890	488441	643918	616861	828951	809035	324239
		cysteinylglycine	2132	179.048	C01419	HMDB00078	439498	58762	1416272	800499	638762	417403	542262	188536	.	.	.	.	1378965	401418	.	.	338139	.	.
		gamma-glutamylalanine	1986	219.098		HMDB29142	440103	389104	5471920	5275044	1978848	3770338	2431266	1950424	6202285	8.30371e+06	13596465	1278740	11292494	9740479	10951537	3159946	3529201	3908123	2628748
		gamma-glutamylcysteine	2118	251.07	C00669	HMDB01049	842	819	11201376	3.1781e+06	2357032	1115749	3046674	2286552	4177899	299338	321539	.	9501461	9335739	.	5866190	9459890	1939346	.
		gamma-glutamylglutamate	1775	277.103	C05282	HMDB11737	92865	83831	.	136589	511010	1593769	.	.	502735	3475457	1811557	.	1927585	1327761	1492827	1280861	.	1036883	.
		gamma-glutamylglutamine	1430	276.119	C05283	HMDB11738	150914	133013	1090343	963030	9620396	2768353	1498658	1267091	1576935	2870992	476279	126562	3925765	3160274	1.82303e+06	604988	1568959	1512014	1051073
		gamma-glutamylglycine	1535	205.082		HMDB11667	165527	145071	.	202356	405916	.	.	.	461762	960401	.	101545	523550	618031	.	285612	315830	790243	.
		gamma-glutamylhistidine	2740	285.119			7017195	5380197	583267	360570	760718	752326	794234	.	461662	926036	.	92223	1820671	1457262	510556	1345126	1176893	1138761	287879
		gamma-glutamylisoleucine*	2940	261.144		HMDB11170	14253342	21403145	331266	274993	351128	295244	127991	.	359120	563671	201387	.	482516	436055	236377	186823	315363	296825	224187
		gamma-glutamylleucine	2991	261.144		HMDB11171	151023	133115	83752	122828	303472	214263	104841	.	241268	259935	85527	.	282923	303284	169892	.	281571	197078	72551
		gamma-glutamylmethionine	2640	279.101		HMDB29155	7009567	5373147	.	191900	149093	313699	157522	.	110232	.	.	.	558178	502911	141696	168068	734816	228719	.
		gamma-glutamylphenylalanine	1825	293.114		HMDB00594	111299	99868	23270	.	33713	19754	.	.	41962	32504	.	.	109984	32161	.	.	35503	.	.
		gamma-glutamyltryptophan	2975	334.14		HMDB29160	3989307	2302065	981570	852618	597724	836238	288995	.	356805	215512	284705	143016	1199627	762939	225543	822586	1.21019e+06	519647	.
		gamma-glutamylvaline	2700	247.129		HMDB11172	7015683	.	1772988	1612556	1447965	1702949	995601	511328	2120987	2161669	884516	361896	5741401	3453710	2105510	1208348	2753600	2411734	598562
		glutathione, oxidized (GSSG)	2667	613.159	C00127	HMDB03337	65359	58835	6497950	6.87972e+06	9797004	14925995	10608947	3.1773e+06	2.86788e+06	3914715	2376115	425406	5319654	13976155	3962476	3.56129e+06	6.30667e+06	8472728	1286465
		glutathione, reduced (GSH)	2000	308.091	C00051	HMDB00125	124886	111188	67123160	22080916	17512608	9789429	72933240	33868704	22978286	427571	802420	.	76949360	104697528	1192008	8577365	36976240	17970320	.
	Glutathione metabolism	ophthalmate	2085	290.135		HMDB05765	7018721	7993181	5754796	4934375	10029108	8013547	5045104	2133267	9428524	1237283	589160	525045	21927186	15140406	5937425	4.01349e+06	9117400	4513166	.
	Serine family (phosphoglycerate derived)	2-methylserine	1652	120.066	C02115		94309	85112	18364016	18820004	13918766	28414714	11461560	7963556	8.16196e+06	9587992	6591307	5171797	19717730	14532701	19379912	11309808	18492156	13164549	5786392
		cysteine	1488	122.027	C00097	HMDB00574	5862	5653	911988	277939	98166	116088	359237	111214	206083	34429.6	17993.8	.	447078	482904	.	267564	209760	43858.6	33927.2
		cysteine sulfinic acid	597	154.017	C00606	HMDB00996	109	107	275194	261478	85533	.	.	.	184297	345080	226312	.	132059	594180	.	95979	438806	89692	137755
		glycine	1375	76.0393	C00037	HMDB00123	750	730	18906940	16484973	24597310	15945954	19112820	8801181	19529752	46134684	9633185	13157162	31619774	26165470	21230860	21207528	16963678	24277104	10688806
		N-acetylserine	811	148.06		HMDB02931	65249	58744	1391407	1.66297e+06	1391341	2206594	1821318	1983494	1610010	3.84914e+06	896213	1075412	2463567	2365582	1180000	847331	1402466	1413637	1324173
		N-acetyltaurine	800	166.018			159864	140553	406511	521304	323290	356959	344114	180748	497891	285230	155507	129995	343344	552268	389698	248457	274430	491577	307266
		S-carboxymethyl-L-cysteine	1490	180.032	C03727	HMDB29415	1080	1050	3426507	3.26632e+06	1026884	1671912	1887054	533110	2697512	3.77656e+06	628158	161661	1402882	1874333	1030142	2058008	1418487	1496597	351006
		serine	1239	106.05	C00065	HMDB00187	5951	5736	60494760	49312508	49571868	93947512	106797576	54800136	36767840	88748960	26230936	22735120	183853744	124330600	72002504	55716632	103553784	59226156	31718228
		sulfate*	616	96.9601	C00059	HMDB01448	1118	1086	17865496	20299062	7925845	6216473	8423290	3729980	8462287	11011571	3231625	4236740	4250595	11858782	2214551	3.97485e+06	12761921	3335153	29058884
	Serine family (phosphoglycerate derived)	taurine	2120	124.007	C00245	HMDB00251	1123	1091	1201309	1102448	745534	1065612	1077637	410169	825596	1247675	475574	123975	1703931	1427945	1565626	419273	1319628	1466700	620724
Carbohydrate	Amino sugar and nucleotide sugar	arabinose	1804.5	195.051	C00216	HMDB00646	66308	59687	2340759	873327	1270963	833083	1226927	542155	663343	1694811	528872	1453799	417080	723212	1135038	753872	816651	1231604	929695
		arabitol/xylitol	1932.4	151.061	C01904		6912	.	15819522	16784422	37398280	7691374	16752222	4711789	18137720	12860940	4452902	7668288	9240524	12572812	13917596	13031954	11488414	11418783	33177104
		arabonate/xylonate	2700	165.041			.	.	51090292	53050060	18427432	47087576	27299984	12146104	35572992	59417968	41413532	88121976	55854424	38933376	44435852	20242388	34684052	26286904	51060820
		erythritol	1491	167.056	C00503	HMDB02994	222285	13835932	134076344	8927460	14682571	2238348	1360384	644394	8611830	3461599	790352	5045134	1125936	1.17604e+06	1136011	7562858	2343938	1145766	3187613
		erythronate*	2186	135.03		HMDB00613	2781043	2061231	22903170	27345594	7123597	17452780	7086900	5194382	22575978	16945004	9264258	49416540	31706844	29704398	10254830	20474400	10595206	5.95612e+06	37932940
		glucosaminate	1091	196.082	C03752		73563	66245	13398969	13859234	23162152	10664068	13487297	5076608	30386204	19669928	17735144	4475839	12780798	14871316	12680182	19996848	14323323	20982940	6145669
		N-acetylglucosamine/N-acetylgalactosamine	715	222.097		HMDB00215	24139	.	14044649	14711383	10476362	9336510	7623174	5843756	6384816	11241782	5131681	8700864	13585890	11085303	8824461	3675456	8689482	7609080	3196027
		N-acetylglucosaminylasparagine	1212	336.14	C04540	HMDB00489	123826	21403014	746744	630020	290037	568479	648100	271265	61405	746307	126177	.	1280092	1060146	185101	1175104	1616641	493514	434475
		ribitol	1789.6	151.061	C00474	HMDB00508	6912	10254628	1.83164e+06	793925	297718	479042	381497	169475	3.23487e+06	2287231	739982	1367192	531078	482163	244434	3759702	678949	304631	1103958
		ribonate	2425	165.041	C01685	HMDB00867	5460677	4574162	44011100	42302504	16351105	31454518	11656730	5936686	52173720	103994712	26954460	63288972	22312192	26897544	26132212	107310576	33504926	15416042	27575420
		ribose	1508.2	195.051	C00121	HMDB00283	5779	4470639	357221	136732	284248	565284	573485	224070	162128	1039471	120952	110059	629716	119611	318280	258780	254215	247835	208245
		xylose	1727	195.051	C00181	HMDB00098	135191	85957	.	145955	100361	.	.	.	121804	103752	.	.	.	201421	.	184108	141719	150333	444730
	Glycolysis	fructose 1,6-diphosphate/glucose 1,6-diphosphate/myo-inositol diphosphates	551	338.989	C00354		.	.	120646	132316	249132	189851	105829	3549595	253824	61517	284333	10028849	.	214454	33623	643287	313598	48742	143887
		glucose	2342	225.062	C00031	HMDB00122	79025	71358	24519720	84018312	76929248	57791260	86894400	46547556	25404948	168647920	79913072	55314424	65921400	17069114	58048120	233404992	77351808	73561616	33504374
		glucose 1-phosphate	4277	259.022	C00103	HMDB01586	65533	58977	81071	.	4337432	2224599	7476931	328044	.	10591304	151778	.	6.74448e+06	.	7745403	1332892	781717	4043746	.
		glucuronate	3233.3	193.035	C00191	HMDB00127	444791	58552	309138	325799	230762	585633	261662	940790	265967	.	303681	.	731717	.	250105	537003	1183154	.	432140
		lactate	1468.8	89.0244	C00186	HMDB00190	612	592	.	3979930	3009155	4614897	7.41523e+06	4074248	.	.	3118367	4.08866e+06	6773428	7348441	11871528	9183353	8994070	8489800	4065797
		pyruvate	1083	87.0088	C00022	HMDB00243	1060	96901	329070	324875	492093	1227094	633627	333049	320617	668030	.	.	1753634	535874	444628	327340	285147	678680	.
	Inositol metabolism	inositol 1-phosphate (I1P)	4785	259.022	C01177	HMDB00213	440194	17215924	319757	347094	323762	1036883	1169181	.	664975	263644	1471124	283874	1333907	.	357261	1622579	749430	462248	57857
		inositol hexakisphosphate	527	658.854	C01204	HMDB03502	890	18505485	2308376	1483972	15614150	1589482	292480	30380606	7993956	521969	82651104	154143152	97934	59616268	145038	40392212	36088852	303234	1029118
		inositol pentakisphosphate	522	578.888	C01284	HMDB03529	439468	.	325002	280089	1795779	203997	37867	13846239	1259828	.	8160802	68429272	.	4889204	.	3568753	2231105	.	168319
		inositol triphosphate	541	418.955	C01243	HMDB01143	439455	.	14847	96625	739537	47567	16445	10483604	194140	.	3.73106e+06	27229240	.	3.50369e+06	.	340961	1093334	.	17349
		myo-inositol	3506.3	225.062	C00137	HMDB00211	892	10239179	20037718	16715655	20003344	25269296	21140606	16363163	9528251	40899832	30255452	30355056	21248736	23346220	37534108	26612958	20496144	23070896	9204382
	Photorespiration	glycerate	2070.4	105.019	C00258	HMDB00139	752	732	6128087	8466081	3234575	8.38697e+06	3999664	2826852	6.82367e+06	8858169	2694875	15487023	9250611	7.12207e+06	4172554	3.51129e+06	3.62065e+06	4029816	11435681
		oxalate (ethanedioate)	603	88.988	C00209	HMDB02329	971	946	10509099	13246145	13152993	12557903	10779756	11149380	10293491	16485881	9212384	16481517	24104872	23904140	13924727	7425685	9317559	15418234	23530756
		tartarate	615.3	149.009	C00898	HMDB00956	444305	852	265132	368045	294384	436982	221442	147118	321435	229443	174803	437510	476624	383698	156750	275226	218618	280858	691241
		tartronate (hydroxymalonate)	610	118.999	C02287	HMDB35227	45	44	102943	125294	180829	162877	92470	137369	122372	109361	155567	255484	122409	168063	112613	161753	91496	123397	388284
	Sucrose, glucose,fructose metabolism	1-kestose	3970	549.167	C03661	HMDB11729	440080	389087	6137422	6684608	3794392	2746939	3370395	969386	1190506	14650669	4994472	280341	4549638	4309228	4677254	4823397	2907727	2233928	701232
		2-ketogluconate	2668	193.035			3035456	2299693	2567723	4069571	445069	11960025	4619225	2313628	32371932	19786572	10834937	9255052	8903140	9098191	3169442	43007084	25031780	7047912	9837642
		3-deoxyoctulosonate	2706.7	237.062			4636210	3826376	2469510	2010527	2079483	5607960	2529473	2481277	3146174	6734941	3084190	581607	9093858	5211442	8.06384e+06	2633525	2134841	6310288	2718884
		6-phosphogluconate	583.9	275.017	C00345	HMDB01316	91493	82615	.	.	.	.	.	.	.	.	73863	1393771	.	.	.	.	.	.	.
		fructose	2065	225.062	C00095	HMDB00660	5984	5764	18412632	21799022	47763384	41569252	51070612	23324178	12067490	155978960	70666016	106751304	44653500	19506266	46582872	196630944	44415140	49110168	30278548
		galactonate	3085	195.051	C00880	HMDB00565	128869	114198	41524932	65107820	13283230	42754900	16132161	6094086	66418764	211541424	628888768	484246912	.	33507502	54589648	92027216	58936556	35719816	44186308
		glucarate (saccharate)	3850	209.03	C00818	HMDB00663	33037	30577	.	.	.	189638	.	.	.	2707168	.	412576	389412	1524311	123812	358922	461868	.	.
		gluconate	2922	195.051	C00257	HMDB00625	10690	10240	120274288	89029440	24436076	47358352	19877192	6650094	137950560	719374720	746305600	792005824	207296080	51397200	299669120	110907184	129912352	78263112	144996976
		maltopentaose	5365	827.267	C06218	HMDB12254	13489094	2941513	233687	50166	563189	234636	438966	117470	183575	689629	53725	91617	481109	.	358618	430209	298507	322835	126602
		maltose	3329.4	387.114	C00208	HMDB00163	10991489	388469	5090698	2493678	24181230	23104646	18973686	21044220	1429635	64688448	2330458	1730877	30537860	.	10863402	34129544	11981006	9184944	861787
		maltotetraose	910	665.215	C02052	HMDB01296	446495	393830	1781304	1002126	5729195	4277513	3111530	2302253	4641033	8058453	1235658	731106	4400819	884671	2568171	3182277	1710029	3299571	2687082
		maltotriose	812	503.162	C01835	HMDB01262	439586	388669	3.53921e+06	2980859	5417366	4692823	4311762	2175454	4697536	20833640	8979387	2184103	6343826	1527795	3975814	9042487	3986379	4534692	3164988
		mannitol/sorbitol	2320	181.072	C00794	HMDB00247	5780	440	37507404	30658160	45632180	14764808	35669344	8710774	35681512	439084320	312531488	390932320	51216256	24211560	109725904	25591688	24216274	39175660	81093968
		mannose	2200	225.062	C00159	HMDB00169	18950	141983	122526	508027	477147	473379	406639	.	415850	1821637	.	3575622	.	507586	.	.	.	378026	526102
		methyl glucopyranoside (alpha + beta)	832	212.113			.	.	3254953	2381077	9136680	7220037	3268304	6.01086e+06	2465482	7.0643e+06	1646175	636755	5299137	1.81451e+06	5185081	6905128	5840417	5250705	434482
		raffinose	978	503.162	C00492	HMDB03213	10542	388379	195533776	174239488	185823664	290795008	200101808	155236000	211558448	202480032	137321584	15876355	108763352	91152288	292856576	160715408	102619312	208599552	138715360
		stachyose	5280	711.22	C01613	HMDB03553	439531	18500725	812663	648992	1165979	1537125	751839	639484	3083316	1763180	1.66142e+06	316743	267734	339944	1028911	817853	349277	728106	827209
		sucrose	3092	387.114	C00089	HMDB00258	5988	5768	959068160	887028160	778796224	918848384	895299328	413529088	648285312	771688512	483440992	80044544	1438123904	1465175040	889762560	788215872	1117510912	980770688	275528640
		trehalose	3495	387.114	C01083	HMDB00975	7427	7149	3555735	3.76451e+06	8.24136e+06	3016874	12175388	1586205	3194875	5269015	2616973	3448373	1770888	2246153	6286544	3496476	2479397	7414004	20021190
	TCA cycle	aconitate [cis or trans]	580	173.009			.	.	18172160	19399748	20742100	14362049	17315696	7487474	20884632	41419064	13530535	4969434	38235992	9109891	25787992	21810968	27375276	27675740	14305258
		alpha-ketoglutarate	2700	145.014	C00026	HMDB00208	51	50	26366818	13548577	49747296	91837856	39773808	15491665	7.79533e+06	28120374	1656394	587756	115379760	6775586	47095280	3421964	12197602	60416228	1898155
		citrate	582	191.02	C00158	HMDB00094	311	305	348369568	277041120	367421376	341006528	382937600	189867168	381134976	623637248	210042848	211023936	817696448	708374720	569269248	309006432	285538304	567582336	330216320
		fumarate	3084	115.004	C00122	HMDB00134	444972	10197150	5.83047e+06	4447945	5358505	8047408	4362912	8702616	14058104	11897896	4598925	3620240	15955730	6653438	3137591	1.43948e+06	3.27837e+06	3225779	6051402
		isocitrate	773	210.061	C00311	HMDB00193	1198	1161	4873453	6861924	4016670	4608445	4147483	2136016	5393385	5372854	3302143	2266806	9650517	8957564	5934317	4392769	4883793	5784282	9318614
		isocitric lactone	2970	173.009			98259	88729	2272239	2327741	2381161	3389300	2.51468e+06	562234	2161887	4993020	577953	536911	1.93448e+06	2401736	4554404	2455601	1708680	4732042	1955180
		malate	615.6	133.014	C00149	HMDB00156	525	510	52760736	57616864	45180896	58272604	42115012	58840948	51889040	64866008	27943996	34584848	162087472	105997936	33089394	13498208	25767040	27334820	77992368
		maleate	2510	115.004	C01384	HMDB00176	444266	392248	2333697	3587561	2266699	4279727	2860238	4592973	3074318	2366154	2819270	3551879	4427484	3.44998e+06	3098776	1801572	1020616	5089944	19344626
		succinate	3149	117.019	C00042	HMDB00254	1110	1078	29036224	34754968	17289868	54835196	43416796	24399172	18405536	44181076	16401113	10557562	68527136	78464672	29965520	15245797	30110524	31516478	33025300
Cofactors & Vitamins	Ascorbate metabolism	ascorbate (Vitamin C)	770	177.039	C00072	HMDB00044	.	10189562	311104	380604	443015	479247	294944	.	344384	387535	181894	174505	590249	615027	422473	323815	384419	515120	189150
		threonate	2384	135.03	C01620	HMDB00943	151152	133224	22672592	25234332	19101496	70520248	82839192	19911208	5344417	22969304	12982197	10956029	47445016	37812164	35993024	4068573	15136905	29160372	35733308
	Carnitine metabolism	carnitine	1978	162.113	C00318	HMDB00062	10917	10455	13183289	18766352	47300132	49031220	50967600	31425846	30052032	16519949	16112254	12185583	12759329	25787408	50868232	12923209	14832292	57443364	41247176
		deoxycarnitine	2052	146.118	C01181	HMDB01161	134	705	1918540	3157620	21148956	56414480	12896290	18175176	5214512	8565371	4605402	2044825	2006281	3131913	13789285	9469029	2433983	13921725	2.65263e+06
	Chlorophyll and heme metabolism	pheophorbide A	1562	593.276	C18021		5323510	.	1846410	3412630	4433566	539367	259621	.	824905	1408391	3623012	10418269	2136734	6240123	1338614	17133292	2513080	1744999	2199024
	CoA metabolism	pantothenate	1498.7	218.103	C00864	HMDB00210	6613	6361	21841958	22006662	19130908	24464452	21155652	7.01149e+06	20564168	22804698	15834451	6551553	26872164	20276664	17965452	7604896	12859580	16612027	6279731
	Nicotinate and nicotinamide metabolism	nicotinamide	1942	123.055	C00153	HMDB01406	936	911	14279980	16808008	10087913	5232921	6520253	3179129	15106076	2409793	3425123	1907455	2412020	33636812	3636404	4087731	3165889	4019622	8442888
		nicotinamide adenine dinucleotide (NAD+)	1434	662.102	C00003	HMDB00902	5893	5681	83249	61295	29844	58080	139211	33980	90373	10888	29446	.	175286	351614	60267	132051	65273	84296	17766
		nicotinamide ribonucleotide (NMN)	766	335.064	C00455	HMDB00229	14180	13553	910048	718946	1392185	2730986	2727360	376940	475474	1221246	918618	330790	4413043	.	2097997	1860933	2303159	2238189	208860
		nicotinamide riboside	2040	255.098	C03150	HMDB00855	439924	.	535887	924354	4854965	6689673	6548002	9896464	849536	10148458	2458234	407402	8718399	172735	11843073	3577986	2249202	9559907	523310
		nicotinate	1350	122.025	C00253	HMDB01488	938	913	4098176	4218344	4089304	5483198	4.17093e+06	1347704	5263335	7484053	6842842	6042327	3377159	4468073	3549803	2827547	2219572	2632368	3198092
		nicotinate ribonucleoside	1536	256.082	C05841	HMDB06809	161234	141635	39173680	32764794	54915272	81048168	85362424	57327840	47213788	82503808	43449660	32630130	121059848	80386224	86827408	83283592	74572864	127622368	30030672
		trigonelline (N'-methylnicotinate)	1388	138.055	C01004	HMDB00875	5570	5369	409891136	391119488	119199248	269132512	217270720	138511024	133363384	421390400	132288112	190328560	603466624	876448768	218371040	281183520	643104832	236525856	125614424
	Oxidative phosphorylation	methylphosphate	544	113		HMDB61711	13130	12578	10125569	9673870	28276252	30148130	30301484	39735128	10590968	23776700	18605960	7606135	20824598	.	23949024	19558296	22232630	24915132	5205299
		phosphate	576	98.9842	C00009	HMDB01429	1061	1032	45408352	45014648	66960796	53637220	64858096	20111406	46861952	93978432	64278184	95176504	57083668	38832704	48865944	91424344	50258148	50576032	49606652
	Riboflavin and FAD metabolism	riboflavin (Vitamin B2)	2292	377.146	C00255	HMDB00244	493570	431981	193996	115529	291964	194968	.	.	85435	359407	260794	595146	95997	.	256565	1783149	273361	.	362591
	Thiamine metabolism	5-(2-Hydroxyethyl)-4-methylthiazole	2310	144.048	C04294		1136	1104	2700689	5074598	719121	729481	421112	110017	2408502	889910	6999241	2128155	1025399	11105355	5270804	2648443	1592770	2369817	3.06378e+06
		thiamin (Vitamin B1)	3050	265.112	C00378	HMDB00235	1130	.	56110456	59703016	41935480	41117512	49895444	11444859	50041392	42559724	12865905	7584908	66040100	64714048	66305564	23346788	18527036	75127080	12414260
	Tocopherol metabolism	alpha-tocopherol	2522	430.378	C02477	HMDB01893	14985	14265	293406816	158549760	11077113	5363969	27779142	21013156	162590096	3725211	18555668	103852088	21987902	1204679	115607384	259138976	270080640	13951068	7313942
		alpha-tocotrienol	1986	424.334	C14153	HMDB06327	5282347	4445512	45705900	31090024	2088945	1005596	9796920	3129917	39715752	107331	3778513	12683160	6212763	.	614516	69024264	44702004	2918125	421548
		delta-tocopherol	2259	402.349	C14151	HMDB02902	92094	83144	2344649	1842978	1446054	1171947	1913214	1244141	950573	453903	1552334	1485608	398106	545627	354332	550519	2261556	783642	962611
		gamma-tocopherol/beta-tocopherol	2384	416.364			.	.	92469376	63990376	41368268	13252701	71603752	54752224	49701904	3140537	46719072	65247336	14400596	4006968	6358175	41385776	78944600	19614952	36858424
		gamma-tocotrienol	1918	410.318	C14155	HMDB12958	5282349	4445514	40523908	30685106	22117324	15848294	36914484	22388738	77890288	1031962	23074292	24889358	9352989	4965922	6363724	43784280	39636968	42772896	10468987
	Vitamin B metabolism (B6 or B12)	pyridoxal	2343	168.065	C00250	HMDB01545	1050	1021	1907336	5204878	1058724	2002587	2131378	471860	547830	824774	2577363	1357447	1007557	4400001	2263897	1645358	851682	2586028	796151
		pyridoxamine	2975	169.097	C00534	HMDB01431	1052	1023	10083935	7174737	6131572	6123225	6498366	2264561	2308539	4309978	2942969	765137	4725614	6302261	2377703	3024434	7034637	3166599	967588
		pyridoxate	2185	182.046	C00847	HMDB00017	6723	6467	5828702	6116050	6.23821e+06	7.7927e+06	6455315	2836123	6293194	3510368	5264722	5483443	8025445	6818976	4964405	3516760	6.67529e+06	5553157	3.00088e+06
		pyridoxine (Vitamin B6)	1657	168.067	C00314	HMDB02075	1054	1025	789456	621016	397391	301702	403625	153550	288755	715047	1428824	2526964	454784	277611	449280	663267	1062745	421388	194852
Lipids	Choline metabolism	betaine	1064	118.086	C00719	HMDB00043	247	24219951173	760890816	748989440	1083239424	769725120	706639872	518408384	757250112	1207892480	436269376	1177238656	882750016	842768960	706340800	768135552	628754944	676484032	615150016
		choline	1961	104.107	C00114	HMDB00097	305	149278	1294475392	1159261568	1789431424	1649665536	1484986368	920461312	1246874368	2426182144	1818164608	1594278656	1928814464	1130878848	1473561728	2030555904	1576313856	1200311808	1153070208
		choline phosphate	700	184.073	C00588	HMDB01565	1014	119298	61603724	67955288	50437032	79527352	26861976	8003918	57261192	24399952	18795226	14824910	88794896	76361840	25400920	46776276	33782272	18898654	10667240
		dimethylglycine	1104	104.071	C01026	HMDB00092	673	653	2.02998e+06	1932195	2817547	5213967	4091642	3060247	2215248	5264044	2427505	949580	3581534	4596701	5571071	1.56063e+06	1838995	5005857	1376995
	Fatty acid amide	linoleoyl ethanolamide	756	368.281		HMDB12252	5283446	4446566	521175	321657	874256	390718	.	460027	482722	2001366	1582012	792302	828625	426811	1355722	1624707	572024	545629	369660
		oleoyl ethanolamide	1661	326.305		HMDB02088	5283454	4446574	8535551	6.73161e+06	5528654	7058496	7123634	3.4279e+06	6.98036e+06	42932260	31094394	20322324	10832046	9517869	33621236	35899540	10812394	11770748	11238996
		palmitoyl ethanolamide	1643	300.29	C16512	HMDB02100	4671	4509	5238649	5027802	6450395	4897484	4.07795e+06	3496815	6133218	21690398	17353224	15976590	5085379	4524807	7986193	9501301	5423027	4690068	7766969
		stearoyl ethanolamide	1787	328.321		HMDB13078	27902	25958	1442195	2066481	2427422	1814415	3.53641e+06	813444	2188380	5598494	4071703	5165194	3.00289e+06	1027113	4.09035e+06	5386280	2823178	3.07008e+06	1992477
	Fatty acid conjugate	acetylcarnitine (C2)	2282	204.123	C02571	HMDB00201	1	5406074	2478641	3476967	6492601	6674208	9747154	4654161	4371018	5865054	10311214	8950443	11353235	2883370	8931088	6.77948e+06	6584184	10347764	10016084
	Fatty acid ester	ethylmalonate	2785	131.035		HMDB00622	11756	11263	3403597	3207780	3930276	4025892	2698628	1.03309e+06	3387873	3268770	1788097	1237880	5862776	4820277	5642764	4164818	3968181	5388301	2.08515e+06
		oleoylcholine	1449	368.352			.	.	5515846	5898317	9660353	4954768	64921712	990927	13404357	245887840	32565950	14916365	139595392	716347	286187840	51935792	7378579	148848592	10672932
		palmitoylcholine	1482	342.337			151731	133731	3240887	2690306	5882820	2522411	9218375	550639	6716083	51063296	8859283	8246323	27461600	787619	20170588	16811656	3047282	13959531	6009880
	Fatty acid, Amino	2-aminoheptanoate	3160	146.118			227939	198338	252051	358192	185492	339353	139298	129788	245400	301483	327940	467877	400287	209657	525360	.	.	488336	292139
	Fatty acid, Dicarboxylate	adipate	3000	145.051	C06104	HMDB00448	196	191	361020	322647	701865	677361	808711	259052	293527	270142	442063	269079	847768	247731	492551	148302	196924	510072	301307
		azelate (nonanedioate)	2520	187.098	C08261	HMDB00784	2266	2179	4265937	4450167	25374184	27398578	31816276	12493019	7.13399e+06	42304772	49549524	46756632	60251064	4270578	52692352	6149973	4733477	53374976	42454420
		dimethylmalonic acid	2702	131.035		HMDB02001	11686	11195	.	101192	117684	100318	.	.	115435	115130	147514	92492	396942	358609	135512	.	63832	220233	538661
		glutarate (pentanedioate)	2900	131.035	C00489	HMDB00661	743	3618533	1053153	1306440	1.03689e+06	1004655	790651	654611	1066119	744372	555855	315012	1069825	654744	1057113	800439	715450	831298	891065
		hexadecanedioate	4615	285.207	C19615	HMDB00672	10459	10027	351189	484987	312712	327798	356332	86330	932138	731177	985380	1939253	226267	118538	658306	655210	463259	623680	818804
		malonate	3447	103.004	C00383	HMDB00691	867	844	48268544	50855808	46326640	62024124	56496944	33915944	46176924	66149988	20423084	13966525	58170820	51519564	62353716	24229710	23748768	56235268	115503408
		pimelate (heptanedioate)	2745	159.066	C02656	HMDB00857	385	376	474160	508398	511326	658909	1.03573e+06	369721	354305	821386	1091164	1032491	1002823	223175	1488614	.	179898	1208467	796845
		sebacate (decanedioate)	1788	201.113	C08277	HMDB00792	5192	5004	249279	226737	716092	639399	715857	337077	321911	1175500	1044111	1127549	1325233	116526	2091287	164610	251223	2156686	1.03891e+06
		suberate (octanedioate)	2577.6	173.082	C08278	HMDB00893	10457	10025	818219	801775	2680019	3378553	5069185	1435929	1369747	5562546	8.23131e+06	8.20294e+06	7390261	736807	8262322	844783	541762	8814417	6237815
		undecanedioate	2440	215.129		HMDB00888	15816	15037	787928	880615	1354961	1359018	1273893	709039	566547	958747	993196	834603	2542168	368463	1124022	382539	445844	1824619	1045528
	Fatty acid, hydroxy	16-hydroxypalmitate	5236.2	271.228	C18218	HMDB06294	10466	10034	2761726	4196040	5406665	6.72964e+06	3030054	1175384	3046617	1.87076e+06	2835259	24265064	3032082	2410189	4.1219e+06	1447818	6158078	4826018	3590114
		2-hydroxydecanoate	4840	187.134			21488	20195	110384	113955	236140	292518	235001	147403	190556	193386	328352	289861	253146	62727	262300	90527	89656	241330	493561
		2-hydroxyglutarate	958	131.034	C02630	HMDB00606	43	42	1957040	2207628	1588558	2131375	1316523	531596	1337827	6927441	2211807	1204194	3813035	3095213	3039800	4785048	1489020	1862419	1791121
		2-hydroxyoleate	5560	297.243			9796304	7972070	2092656	3148105	3796418	3409348	.	1277272	603506	7.26369e+06	1063670	1587692	7011128	.	10714576	761655	964349	8708785	4068126
		2-hydroxypalmitate	5511.2	271.228		HMDB31057	92836	83805	3533278	4969252	4485742	3435269	1363757	1834883	1299919	5091291	798193	4.00202e+06	3910788	3745682	7.97753e+06	4294864	1709658	4442615	7784686
		2-hydroxystearate	5695	299.259	C03045		69417	62625	1848067	1881711	2359797	1201962	188658	1244322	430140	1.81003e+06	242654	1084851	1212429	1411709	1999325	369659	343752	1120489	1761609
		3-hydroxydecanoate	4634.7	187.134		HMDB02203	26612	24790	127811	145580	144586	159745	89671	92279	242615	198308	139921	130098	127264	131890	200233	138246	84027	78976	325308
		3-hydroxymyristate	5335	243.197			16064	15252	1168339	1601321	989128	1266082	661539	709885	2580481	1436120	1242037	2205822	1097731	1060935	1393543	1083864	885570	1188983	2590865
		3-hydroxyoctanoate	3446	159.103		HMDB01954	26613	24791	146931	80154	308888	238450	145685	.	261214	467344	637866	638013	621516	204469	801171	85353	110845	1016921	1139549
		8-hydroxyoctanoate	2300.4	159.103		HMDB61914	69820	63018	362989	511867	1.6592e+06	1545932	1640272	1037089	800328	3.3682e+06	3.67814e+06	2545930	2116511	373532	1384151	359441	905117	1922018	5817410
	Free fatty acid	10-heptadecenoate (17:1n7)	5555	267.233		HMDB60038	5312435	4471860	11483100	12421506	16506706	13752480	3486181	6879408	5564067	32343204	3103180	12371893	43623296	2658064	24862572	4241161	5353738	24112638	9812039
		10-nonadecenoate (19:1n9)	5780	295.264		HMDB13622	5312513	4471938	3243039	4642164	6602185	4249022	535402	1617543	756033	17809828	443474	2627975	22999944	.	15258363	873881	783521	15098824	3482676
		arachidate (20:0)	6240	311.296	C06425	HMDB02212	10467	10035	199570176	368672192	454770624	236065376	82383080	110285824	43043184	778260608	40707272	276112512	983341056	20597520	1094115712	50450868	24883604	1136331648	323781952
		behenate (22:0)*	6745	339.327	C08281	HMDB00944	8215	7923	45669248	69264032	107542568	68749008	14704714	22644618	13682030	156740480	10936631	50894028	252057648	18781528	215748848	10924878	4358553	269861280	84314720
		caprate (10:0)	5090.7	171.139	C01571	HMDB00511	2969	2863	1643637	7641247	2724258	3.50462e+06	6444255	2139888	3989777	4576995	14910454	5842612	5616374	1429137	8200374	5.60928e+06	5214364	4731631	2488321
		dihomo-linoleate (20:2n6)	5730	307.264	C16525	HMDB05060	6439848	4944228	5622181	9850344	19294648	8612775	659489	3490197	1574893	41230668	981336	7.95511e+06	46571776	774004	29541376	1619117	1036605	33819388	6359098
		docosadienoate (22:2n6)	6034	335.296	C16533	HMDB61714	5282807	4445934	390581	501520	552732	382994	26414	134864	.	1.52323e+06	35473	374553	2504035	55379	1483611	81246	58872	1409484	324836
		eicosenoate (20:1)	5950	309.28	C16526	HMDB02231	5282768	4445895	116062824	230121152	310526144	152520464	16822068	70515760	30078800	794706112	21923084	171917312	1013149824	11514699	811899008	28943624	16679565	769768576	139754624
		erucate (22:1n9)	6355.6	337.311	C08316	HMDB02068	5281116	7924	6990277	11853911	13259078	6443196	805944	3023832	1180566	36354944	1425371	10378321	45943588	1098149	39018164	1369599	953261	47447288	9237523
		laurate (12:0)	5300	199.17	C02679	HMDB00638	3893	3756	8793828	14192414	18465632	12600417	31985172	5875129	17557624	29563452	230891664	48777068	29146868	4581388	35128884	19370772	15941017	29422936	12269034
		linoleate (18:2n6)	5535	279.233	C01595	HMDB00673	5280450	4444105	6416642560	7919202304	11176004608	5644521984	2451837696	3871020032	4781896192	15973494784	3064545280	7948342784	18413901824	811857408	15835097088	3926433536	3512234496	16632908800	6745630208
		linolenate [alpha or gamma; (18:3n3 or 6)]	5450	277.217	C06426	HMDB03073	5280934	4444437	573561792	823846656	1179275008	471557920	518260448	277703328	789574912	1979459072	415405824	488140672	1725693056	35826220	1885334912	447892032	381880544	1673456896	536762976
		margarate (17:0)	5731	269.249		HMDB02259	10465	10033	23826378	32069140	47501200	29532476	9039291	15893093	7.19151e+06	69235904	5434507	26556616	74394352	8472619	80126248	7730794	5965527	86459640	31408646
		myristate (14:0)	5440	227.202	C06424	HMDB00806	11005	10539	203288544	291846176	373821760	243286304	257955008	132645784	226281904	691053376	337289056	207693968	639219712	34382908	691387520	277742624	266804800	679902592	224922608
		myristoleate (14:1n5)	5346.9	225.186	C08322	HMDB02000	5281119	4444564	8936271	13190407	12068745	10309661	43545380	4044637	15798103	37249932	13441213	10371719	39432856	663705	49190816	30135498	13906878	32204646	6836554
		nervonate (24:1n9)*	6804	365.342	C08323	HMDB02368	5281120	4444565	1415647	2714419	2390138	1516122	115198	516330	268568	6310755	141918	1.93694e+06	8115385	721768	8924741	201474	184141	11682185	2754120
		nonadecanoate (19:0)	6068	297.28	C16535	HMDB00772	12591	12071	4293538	5759370	9913341	5164729	1320926	3195676	1379602	13035155	820572	4632881	19386720	2305853	10781542	1060867	910062	16875680	6.42498e+06
		oleate/vaccenate (18:1)	5655	281.249			.	.	7420353024	10283234304	10048740352	7709652480	1514921344	4737426432	2289750528	20554586112	1717941504	8697854976	21106558976	767339456	22517301248	1957113088	1560817280	20809099264	6745518080
		palmitate (16:0)	5618	255.233	C00249	HMDB00220	985	960	5651434496	7227872768	8475416064	5776842240	3430225664	3511439616	2688278272	9167081472	2588937728	6172773888	8897031168	779234816	10636612608	2460883968	1807814272	13058106368	6556456960
		palmitoleate (16:1n7)	5475	253.217	C08362	HMDB03229	445638	393216	111199456	140209936	177407536	130233920	93950464	70672136	116044104	365821376	81441152	138096736	335945280	12955382	394635840	85301776	88055456	380305728	115083496
		stearate (18:0)	5872	283.264	C01530	HMDB00827	5281	5091	1062155776	1364668416	1424168320	928791040	388782112	684301440	226096192	2233096448	211606512	1330015360	2520705536	271175872	2808162560	245792176	187454624	2993277184	1174395520
	Galactolipids	1,2-dilinolenoyl-digalactosylglycerol (18:3/18:3)	1941	954.615			.	.	2486223	1950319	1057280	3462783	2381973	1753675	.	2113695	.	268921	2756295	3005159	.	800488	2368069	463622	.
		1,2-dilinolenoyl-galactosylglycerol (18:3/18:3)*	2046	792.562	C13871		5282287	4445458	4963150	1843263	1864080	9228171	3181490	5165334	1161705	1379260	347714	229633	1614669	10570561	.	521423	3658773	752640	1140371
		1,2-dilinoleoyl-digalactosylglycerol (18:2/18:2)*	2256	958.646			.	24785309	2601969	1608029	1.49374e+06	1162371	1728774	1.65645e+06	1.17821e+06	2.05664e+06	1.73006e+06	799302	2.96781e+06	2076132	.	2.26038e+06	2.90554e+06	632907	1.14953e+06
		1,2-dilinoleoyl-galactosylglycerol (18:2/18:2)*	2415	796.593			6535011	5019375	15280268	5.29731e+06	4206827	11317721	3072824	5973200	5293452	2554408	1111699	932583	1893394	17438826	577374	4164996	7.07872e+06	768406	1583343
		1-linoleoyl-2-linolenoyl-digalactosylglycerol (18:2/18:3)*	2073	956.63			.	24785583	2.00902e+06	1526894	760611	1.71258e+06	2137599	1449527	.	2457418	928173	293140	3.41969e+06	2011707	.	1186188	1915442	325533	827434
		1-linoleoyl-2-linolenoyl-galactosylglycerol (18:2/18:3)*	2209	794.578			.	.	6895256	2489347	1184706	5736664	1931155	3362935	1196517	.	.	.	657612	6114110	.	624638	2321631	.	570370
		1-oleoyl-2-linolenoyl-digalactosylglycerol (18:1/18:3)*	2266	958.646			.	.	1841399	1789779	753838	2130850	2368237	1.04259e+06	347522	1.36452e+06	272576	47599.4	1.18711e+06	1754986	.	458565	878887	.	82308.9
		1-oleoyl-2-linolenoyl-galactosylglycerol (18:1/18:3)*	2448	796.593			.	.	2.63948e+06	947860	748134	5312710	1802336	2.59887e+06	563057	1069719	.	.	.	2.74611e+06	.	.	365770	.	.
		1-palmitoyl-2-linolenoyl-digalactosylglycerol (16:0/18:3)	2278	932.63			.	24785524	598769	493829	323849	887323	633879	580411	186993	453986	371149	.	460158	945898	.	850053	1201117	.	.
		1-palmitoyl-2-linoleoyl-digalactosylglycerol (16:0/18:2)*	2498	934.646			.	24785221	5672605	3321161	1627110	3.40978e+06	1.83554e+06	5318895	4211714	1560960	3447896	1635158	2245468	5099360	413796	7.48134e+06	5792093	376198	1.0209e+06
		1-palmitoyl-2-linoleoyl-galactosylglycerol (16:0/18:2)*	2731	772.593			.	23326991	2378484	1021496	.	.	.	2940845	1333770	.	699115	.	.	3864900	.	1281922	1254071	.	597520
		digalactosylglycerol*	781	415.146			.	24695921	10003723	8.3191e+06	2161014	3.36529e+06	3022339	1.87272e+06	3313619	4470263	1093251	276711	3356164	2506356	7812407	5357159	1833274	4744223	1355043
		galactosylglycerol*	795	253.093	C05401	HMDB06790	16048618	10263569	1092191	998995	738410	754580	.	401859	566574	5087845	1655498	272190	1056920	326691	2646096	425969	326177	1547139	736025
	Glycerolipid Metabolism	glycerol	758	91.0401	C00116	HMDB00131	753	733	13147630	12983306	24234878	12428011	62137880	6081576	20655736	55706700	14490603	22132288	68238320	238239	78873736	34880284	18763828	88232192	15423035
	Glycerolipids - Diacyl	diacylglycerol (14:0/18:1, 16:0/16:1) [1]*	3057	584.525			.	.	17986000	18481476	16203004	18660800	43034856	8087539	37048164	18631812	10730078	9256173	22535676	4613339	26922976	38154200	25448248	24191374	8472712
		diacylglycerol (14:0/18:1, 16:0/16:1) [2]*	3183	584.525			.	.	15239751	14359966	15464352	16928608	21354058	11513503	19862356	10568743	5299942	7.4615e+06	11970026	7393819	10892767	19156604	14110792	10100350	4111055
		diacylglycerol (16:1/18:2 [2], 16:0/18:3 [1])*	2733	608.525			.	.	54031056	49761288	50593844	59439104	36827136	25530900	73935064	36386108	17549634	21772570	29457092	10702856	12418106	27290956	30321136	12426542	19693872
		linolenoyl-linolenoyl-glycerol (18:3/18:3) [1]*	2229	630.509		HMDB07278	.	.	.	1740854	4356894	2399233	9669498	1589335	.	8991125	5650631	5269094	7140214	.	6706115	5047490	4244249	9800417	1416558
		linolenoyl-linolenoyl-glycerol (18:3/18:3) [2]*	2268	630.509		HMDB07278	.	.	7.45701e+06	5229214	13429761	9417860	9747424	6105150	17528004	6.02008e+06	2022528	3019722	5527833	2378033	3550430	5105206	5.84409e+06	4120362	1066537
		linoleoyl-linolenoyl-glycerol (18:2/18:3) [1]*	2426	632.525		HMDB07249	.	.	164343056	153048464	239476848	173725728	240250032	96173336	350720480	192812032	81681464	117015576	192906464	13366391	144269792	262214176	166215024	157067584	69015264
		linoleoyl-linolenoyl-glycerol (18:2/18:3) [2]*	2478	632.525		HMDB07250	.	.	178884560	191875840	256709760	300860896	195824608	144117008	291584640	138516816	47415944	120777952	171362080	35197672	112571528	187815360	109482888	117471656	48014688
		linoleoyl-linoleoyl-glycerol (18:2/18:2) [1]*	2689	634.54		HMDB07248	.	.	893834368	1020906240	1298027776	1087807232	1153079552	573335616	1364553728	936484480	492752224	708364736	1219430656	255675248	794568704	1125825152	1029913152	910556800	518097600
		oleoyl-linolenoyl-glycerol (18:1/18:3) [2]*	2819	634.54		HMDB07220	.	.	136309168	161841312	142534032	183340768	188439392	68944584	189826288	83410760	23576752	33425102	107986432	35296232	94566136	112706592	82264824	91283760	26306120
		oleoyl-linoleoyl-glycerol (18:1/18:2) [1]	3115	636.556		HMDB07219	.	23975985	843536448	933386112	892323520	896165056	1255588480	621847232	1178830592	958074304	567661056	783052288	1128671616	328703776	1064893760	1230900992	959287488	1091158016	566224384
		oleoyl-linoleoyl-glycerol (18:1/18:2) [2]	3223	636.556		HMDB07219	.	29788004	850049984	990120128	1010134592	1018784512	1139616128	797347136	1090951936	808781120	403832000	766184640	941635136	514648768	766768192	1063826816	816169216	858677568	385617728
		oleoyl-oleoyl-glycerol (18:1/18:1) [1]*	3571	638.572		HMDB07218	.	.	572445952	656910976	462107552	573015616	913999680	441960384	803145024	614754944	431763936	624591040	690556224	155045024	771145216	760911232	627926784	644918144	288387392
		oleoyl-oleoyl-glycerol (18:1/18:1) [2]*	3695	638.572		HMDB07218	.	.	589829952	715566528	502482400	686994688	853002112	593159872	753729152	524270112	373206112	587079168	595224896	334523616	629364544	593010752	594697408	540477888	237139472
		palmitoleoyl-linoleoyl-glycerol (16:1/18:2) [1]*	2664	608.525		HMDB07132	.	.	19071438	19123344	19503302	16134759	31305730	8686361	34869008	13461796	7062960	13620754	23965568	3590793	18447084	22611912	21524668	23065012	6890809
		palmitoyl-linolenoyl-glycerol (16:0/18:3) [2]*	2834	608.525		HMDB07105	.	.	60965824	54500900	68943936	85597504	33501732	30086790	80673832	26705812	8.24122e+06	12275383	31240324	15444473	6917331	25692092	28022216	7.95856e+06	10967787
		palmitoyl-linoleoyl-glycerol (16:0/18:2) [1]*	3080	610.54		HMDB07103	9543695	7822645	355305568	295874112	374766400	342804000	171604576	207145280	428212992	252404288	191314224	258414608	234082976	137261664	75738176	240455584	281453184	85242064	199787184
		palmitoyl-linoleoyl-glycerol (16:0/18:2) [2]*	3197	610.54		HMDB07103	.	.	441735744	358872384	529868384	481191136	217448176	363106784	474419040	264225312	156474976	292769376	270497600	218642976	53263992	259892704	294876736	87544528	162389808
		palmitoyl-myristoyl-glycerol (16:0/14:0) [2]	3180	558.509		HMDB07095	.	.	941797	769071	1129223	901339	1038324	510676	1891748	751697	449270	460860	864255	233851	276152	1556486	1057995	224888	407672
		palmitoyl-oleoyl-glycerol (16:0/18:1) [1]*	3562	612.556	C13861	HMDB07102	.	.	203575040	180419408	185374064	201621184	122016704	132270800	289559296	174038352	119053832	178973472	157559232	53225904	51980492	160572304	185826064	55625204	115028288
		palmitoyl-oleoyl-glycerol (16:0/18:1) [2]*	3695	612.556	C13861	HMDB07102	.	.	260964928	230522704	258545072	282317760	170608400	238981120	332638624	192036352	119932920	202469808	187680096	116530848	55671784	195253760	204063104	62834452	106219528
		palmitoyl-palmitoyl-glycerol (16:0/16:0) [1]*	3568	586.54		HMDB07098	.	.	16380625	12007699	14117621	17476332	15122841	7.06745e+06	23399000	13733163	10415729	30512902	25298092	2445819	898557	19827938	26037780	2485036	11712567
		palmitoyl-palmitoyl-glycerol (16:0/16:0) [2]*	3734	586.54		HMDB07098	.	.	19277680	17321424	17170900	17336566	17410020	10411090	32168604	16917314	10411688	22264362	26691614	2911639	3157073	18136796	19030864	4020580	10669592
		stearoyl-linoleoyl-glycerol (18:0/18:2) [2]*	3762	638.572			.	.	91520672	90146272	82957776	91533328	73209992	62037780	101957168	39159100	28297306	74402840	50301980	18094198	19728288	89994464	.	.	.
	Glycerolipids - Monoacyl	1-eicosenoylglycerol (20:1)	1830	402.358			.	21403139	1397446	1252131	911633	1165588	3103935	466212	4.04956e+06	564585	334380	361584	1225797	.	2147335	2654527	1432888	1443339	412084
		1-linolenoylglycerol (18:3)	1533	370.295		HMDB11569	53480978	21403134	10576829	9185302	11680443	13508206	22673418	6.70401e+06	28432814	6.94184e+06	3619354	7095263	9792014	3.33581e+06	20808174	15969240	10041698	21646112	7907456
		1-linoleoylglycerol (18:2)	1595	377.266			5283469	4446589	105625408	121797872	153889136	123583600	261901040	43827244	258686288	75280928	15659593	48685936	168143872	5973251	177285920	211250688	115264376	186999040	22745496
		1-myristoylglycerol (14:0)	6353.3	227.202	C01885	HMDB11561	79050	71382	5861627	4759679	5785708	3350646	859538	3863370	1651568	7406044	357976	1487922	9982747	2272727	8532361	1024907	773746	7628710	1817103
		1-oleoylglycerol (18:1)	1695	379.282		HMDB11567	5283468	4446588	95169272	117182336	76954320	102751448	227762672	35626832	207222896	68106712	14541962	43005984	119367104	2186227	163986752	150658432	88032168	140221216	18675402
		1-palmitoylglycerol (16:0)	1689	353.266		HMDB31074	14900	14201	41043976	37724432	36184132	30347328	46560036	9657521	96236984	28853132	13895548	22185280	37002484	929719	27836360	50637560	36420020	26597200	10993441
		2-linoleoylglycerol (18:2)	6250	279.233		HMDB11538	5365676	4517636	29581144	36138444	61023984	33140832	2326800	18032518	11770886	25549518	.	7636163	64769940	6279412	32045690	3759245	3.80274e+06	37159508	6891360
		2-oleoylglycerol (18:1)	6500	281.249		HMDB11537	5319879	4478086	53519636	65983512	50201140	78469440	4.04406e+06	27283918	21406724	34451168	806669	11484586	83064160	7136288	72617240	6125295	2665034	56776364	9961077
		2-palmitoylglycerol (16:0)	6400	255.233		HMDB11533	123409	110006	23431538	18518928	17083310	16346078	1347122	8.16556e+06	10843976	9933012	.	5290007	17375852	3061379	4660135	1656994	1353255	6696305	4675542
	Lyso-phospholipids	1-linolenoyl-GPC (18:3)*	1422	518.324		HMDB10388	.	.	5311398	4544963	3534422	1854568	3549640	3335954	2773074	3.7055e+06	1573251	923145	3174455	1421816	1758334	1588583	2549995	1.55216e+06	846435
		1-linoleoyl-GPA (18:2)*	5483	433.236		HMDB07856	.	24766514	671662	261818	.	486635	1077064	64775	204559	763486	149833	.	2371285	823220	.	1.96258e+06	1072407	251272	1351407
		1-linoleoyl-GPC (18:2)	921	564.331	C04100	HMDB10386	11988421	10160888	9285030	11245689	12504396	6683499	9204409	8887912	8453699	9071907	6734113	3554783	11635231	2973993	5307327	7785145	6408827	4042312	1687766
		1-linoleoyl-GPE (18:2)*	1482	478.293		HMDB11507	52925130	21403170	48978848	41681424	38361708	22529922	45183020	37143400	30168206	21416334	22100710	11163633	30218248	10310906	12422097	29071996	24232568	14542941	5274022
		1-linoleoyl-GPG (18:2)*	860	507.273			.	.	820745	610336	445988	572700	1078214	649611	175518	972994	312221	.	2367763	69627	.	195504	405340	87505	487496
		1-linoleoyl-GPI (18:2)*	1337	595.289			.	.	735447	1159062	349679	350435	1372073	65807	1347923	125138	215153	501590	3040409	145095	301610	667351	792445	881526	311721
		1-linoleoyl-GPS (18:2)*	5500	520.268			.	.	881275	733804	1520764	626506	501046	689519	234778	302953	95723	53227	2004464	419233	.	57822	129107	314388	611157
		1-oleoyl-GPC (18:1)	1540	522.355		HMDB02815	16081932	17240641	265029424	333534528	240981952	169053632	352963040	157061648	193931808	53024980	90240320	50596232	244543824	34614732	54268776	213990144	133592208	39205344	41915912
		1-oleoyl-GPE (18:1)	1554	480.308		HMDB11506	9547071	7826021	32121660	36217308	21673740	18762220	42532956	15119825	21830974	4435197	5809693	4096644	21700370	3131093	4434026	24939816	18258956	4653840	2924646
		1-oleoyl-GPG (18:1)*	825	509.288			.	34999689	883071	1.00182e+06	630161	622500	2320347	428875	169988	1260119	384937	.	4443797	.	120124	398849	452272	165752	383967
		1-oleoyl-GPI (18:1)	1600	599.319			.	.	889926	2862249	384361	625472	4004034	.	1777757	.	429757	1057487	4538845	.	.	1993011	1099690	2388461	363949
		1-palmitoyl-GPA (16:0)	5600	409.236	C04036	HMDB00327	6419701	4925335	514527	.	.	.	.	54870	174489	.	110415	74068	.	734193	.	258117	316028	.	519078
		1-palmitoyl-GPC (16:0)	1525	496.34		HMDB10382	86554	78064	314276064	260794544	219998192	134628784	151233152	233276288	225236848	240899040	226174368	164883088	105285712	79800040	158371264	170925472	187028160	98118920	64221100
		1-palmitoyl-GPE (16:0)	1544	454.293		HMDB11503	9547069	7826019	40059376	29438918	16637789	14409414	15531759	31973056	23515418	25130856	21908012	18770208	11250357	10726769	13806008	19953830	24454316	13993281	4606129
		1-palmitoyl-GPG (16:0)*	833	483.273			3300276	2548639	2816217	2130676	1.40959e+06	1.47876e+06	1331568	2872803	895171	3555776	1475027	762345	1407236	274108	1284771	608322	1626118	697301	674366
		1-palmitoyl-GPI (16:0)	1346	571.289		HMDB61695	.	.	702599	782952	212068	188749	203498	31116	1.55734e+06	164807	507552	1057747	1366455	121855	186342	642860	965277	289151	244346
		1-stearoyl-GPC (18:0)	1606	524.371		HMDB10384	497299	435389	19100092	15702968	7652658	4903528	8.17394e+06	8868002	7.69305e+06	7376981	7561925	8763291	4.05349e+06	1465754	6688881	11751622	7.91366e+06	3852191	2122823
		1-stearoyl-GPE (18:0)	1626	482.324		HMDB11130	9547068	7826018	1348470	1216344	231766	265764	466995	587593	487386	.	404459	404877	340567	.	259197	756009	656312	235485	.
		2-palmitoyl-GPC (16:0)*	1505	496.34		HMDB61702	15061532	21403165	28786574	22312122	20574060	10324026	10118322	20572884	20716258	16057022	17444954	11887853	9275722	6999822	11264239	15686220	.	.	.
	Oxylipins	12,13-DiHOME	5137	313.238	C14829	HMDB04705	10236635	8412123	4929566	4133839	32301362	14676061	14063280	7.5437e+06	4652072	37823788	26813192	78030144	48964160	1255187	42596360	13825105	13222355	70320256	2686539
		13-HODE + 9-HODE	5275	295.228			43013	.	76064320	230759952	1227173760	2854539264	934583872	423767392	207470064	5963103744	494674304	1241239552	4443655168	49088704	2853296128	1287387136	2055140480	2650924544	304699680
		13-HOTrE	1313	277.216		HMDB10203	16061072	10784491	13323954	32062378	57789480	100087376	59332796	21755068	19076116	195305600	45894608	55881436	128964384	10979927	109053648	45997368	75464496	102459000	26200474
		9,10-DiHOME	5180	313.238	C14828	HMDB04704	9966640	8142232	7288512	7306344	32520678	16433325	14617123	9811451	9947100	28979024	39912456	116008088	40752620	2342825	48657396	25029284	13577764	57728360	9946296
		9,10-epoxystearate	5390	297.243	C19418		15868	15081	101053248	345375328	271973024	434492960	429018624	96432760	208252576	2271779840	206220032	617522624	1467741056	10229304	1058924800	238318624	447136352	908025920	288611776
	Phospholipid Metabolism	glycerol 3-phosphate	580	173.021	C00093	HMDB00126	754	734	12238773	17832748	16488538	14748806	14790993	3437091	9110064	20340558	13506532	7197172	18972740	1.90011e+06	15457014	19130060	12895650	16833412	18321916
		glycerophosphoethanolamine	3075	214.049	C01233	HMDB00114	123874	110410	1214858	1645111	1.72178e+06	1.89587e+06	6512574	1560409	1389156	1523229	923641	220167	5089001	880456	8873745	1116504	1241489	10040490	943747
		glycerophosphoglycerol	2430	245.043	C03274		439964	388990	1.60707e+06	2907987	3246770	3238018	10655648	962211	2390485	10555268	2745890	366761	13554922	1822003	24664438	5589711	3176870	17955252	1468553
		glycerophosphoinositol*	516	335.074			167572	.	16291613	19370238	20101500	14976825	37167536	6749982	27538944	4.86112e+06	4960793	2.88037e+06	48493768	17977828	88327536	20745022	19480292	126686008	8.3507e+06
		glycerophosphorylcholine (GPC)	672	258.11	C00670	HMDB00086	71920	571409	1098509312	1292520192	1638417280	1409356032	2136123264	589078656	1202817536	1258065408	880562048	264619376	2371280384	1770048384	2660481536	1862946048	1509831424	2634963200	512958528
		phosphoethanolamine	638	140.012	C00346	HMDB00224	1015	990	73100	93427	171930	172461	101619	83440	60329	32290	.	.	182007	89730	68233	87299	75067	62628	.
	Phospholipids	1,2-dilinolenoyl-GPC (18:3/18:3)*	1800	778.538		HMDB08206	.	24766868	843961	1117972	797058	1575499	1103091	370541	.	.	.	.	1923793	1473288	.	946952	3817378	.	303168
		1,2-dilinoleoyl-GPA (18:2/18:2)*	2530	714.507			.	30786253	12756394	3.50553e+06	20808896	21773316	18514696	4764558	5449474	11973326	2442791	775173	20510994	6276014	5224393	63280872	38320096	4692705	4302139
		1,2-dilinoleoyl-GPC (18:2/18:2)	2006	782.569		HMDB08138	5288075	4450312	170864384	137515680	192506288	161788752	107681640	39472040	196509536	9062218	8768420	3640600	92364160	333005408	15839791	142286144	168475968	9896934	12057207
		1,2-dilinoleoyl-GPE (18:2/18:2)*	2083	740.523		HMDB09093	9546812	7825762	36005372	20198620	30473180	36969488	13641626	15585542	27361984	1891567	764537	521441	14821817	87207400	1142512	18624434	29940346	1444937	2568409
		1,2-dilinoleoyl-GPI (18:2/18:2)*	2388	876.56		HMDB09850	.	24767735	13815199	12033759	3511922	6238645	1770086	678124	11457505	555042	354367	.	6.80637e+06	24705734	.	18099148	10279339	.	917507
		1,2-dioleoyl-GPA (18:1/18:1)*	3203	718.538		HMDB07865	.	21403062	11233222	4002501	8.38194e+06	17072796	18263172	4849635	4683062	7666115	2513685	1002862	12850790	3216653	6317340	38307236	26776224	4922795	6024600
		1,2-dioleoyl-GPC (18:1/18:1)	2346	786.601			10350317	8525772	261865968	213017104	121446432	191562192	82945904	114256072	208233104	5574153	15028179	7.38938e+06	69429336	281784352	34256404	96144736	144652976	5883434	26275736
		1,2-dioleoyl-GPE (18:1/18:1)	2485	744.554			9546757	7825707	40786704	25915650	13789662	28053932	12886431	11150242	33010284	1202840	873987	607616	8466957	39735100	2719056	14472690	21082268	1318320	1572940
		1,2-dioleoyl-GPI (18:1/18:1)	3121	880.591		HMDB09837	.	24767722	18978868	17059122	1800328	6155552	3067284	954412	12596912	.	714290	458881	4211114	25974708	.	14591677	8179340	.	697981
		1,2-dipalmitoyl-GPC (16:0/16:0)	2365	734.569	D03585	HMDB00564	452110	398235	11234971	11519982	18217168	6889989	2.07464e+06	4572696	22695622	952560	1848966	400654	4368631	8219980	35001852	19243784	7.15763e+06	640008	789930
		1,2-dipalmitoyl-GPG (16:0/16:0)	3157	740.544		HMDB10570	11846227	10020701	3323144	2746021	1610369	2169565	537441	963618	1907300	.	414421	113037	954363	3.73573e+06	.	1469649	2059084	202203	.
		1-linoleoyl-2-linolenoyl-GPA (18:2/18:3)*	2300	712.491			.	.	549811	.	975010	1321967	1388206	185112	.	542777	.	.	1207945	418421	116997	2857840	2969947	.	138097
		1-linoleoyl-2-linolenoyl-GPC (18:2/18:3)*	1939	780.554		HMDB08141	.	24766802	4219701	3597660	4413037	5125134	1068226	1857383	4570786	.	.	.	1501905	22576142	.	2282539	5643034	.	509832
		1-oleoyl-2-linoleoyl-GPA (18:1/18:2)*	2800	716.523			.	29368422	19996296	6318242	24104072	31812344	29911538	6.86339e+06	7927598	14693871	4726863	1130138	26778720	7055861	10413756	73260408	46567968	7689551	8269556
		1-oleoyl-2-linoleoyl-GPC (18:1/18:2)*	2165	784.585			.	.	274612288	226018624	194166944	223736272	92192928	124762432	259680512	8355616	16142578	6656308	98909944	372732384	15604629	143499952	204322272	6191155	33103304
		1-oleoyl-2-linoleoyl-GPE (18:1/18:2)*	2270	742.538		HMDB05349	9546753	7825703	59145416	38086840	34576840	50336672	23929988	21805712	49243260	2777017	1373577	912878	18412328	77676776	1903960	27990914	37185676	2302608	3811136
		1-oleoyl-2-linoleoyl-GPI (18:1/18:2)*	2700	878.575		HMDB09838	.	24767723	27801368	24737432	6931555	9592383	4734776	1501328	16945632	912870	1183801	960590	9701681	32891820	456184	22407534	14933824	869582	2103004
		1-palmitoyl-2-alpha-linolenoyl-GPC (16:0/18:3n3)*	2034	756.554		HMDB07975	.	24766646	5169913	6845093	7570293	8.19184e+06	.	2214647	9706399	.	291590	216926	2437724	16807472	6213746	5353085	11132277	.	276099
		1-palmitoyl-2-linolenoyl-GPA (16:0/18:3)*	2526	688.491			.	.	376795	.	481384	685077	520128	.	.	416697	.	.	538081	158788	.	1690218	2019941	.	.
		1-palmitoyl-2-linoleoyl-GPA (16:0/18:2)*	920	671.466		HMDB07860	9547167	7826110	1246605	447472	2045358	2339138	1668172	171434	1091977	2483472	383664	167995	2745189	1947943	258129	7419444	5487143	735095	389277
		1-palmitoyl-2-linoleoyl-GPC (16:0/18:2)	2160	758.569		HMDB07973	5287971	4450224	127929192	105012520	150463776	121609656	28488828	65088256	148259504	6646647	10166310	5040196	50788136	207686128	47020972	96391808	133910744	4429963	16905746
		1-palmitoyl-2-linoleoyl-GPE (16:0/18:2)	2275	716.523		HMDB05322	9546747	7825697	41387900	26291614	33942868	44262456	13319901	22518380	37551832	3293467	1761056	857842	16300444	83774832	2304472	23252108	40148992	2311776	3111359
		1-palmitoyl-2-linoleoyl-GPI (16:0/18:2)	2730	852.56		HMDB09784	.	21403024	54128960	47090504	27894662	36971436	9950319	6.98777e+06	64319100	4415185	4672580	3074307	35122392	113249456	1859956	42159092	74226720	3774213	7.7332e+06
		1-palmitoyl-2-oleoyl-GPA (16:0/18:1)	935	673.481	C13889		5283523	4446637	1065098	461884	1025547	2287788	2072268	132584	1116271	1984689	518756	210336	2348414	1770829	287081	7359386	5861318	815829	389516
		1-palmitoyl-2-oleoyl-GPC (16:0/18:1)	2358	760.585		HMDB07972	6436017	4940699	204398048	176880224	181001472	191629792	48854384	124975976	213935104	7556493	15254408	8.09475e+06	66623588	251095168	123862784	117725560	179044368	6190653	27072822
		1-palmitoyl-2-oleoyl-GPE (16:0/18:1)	2509	718.538		HMDB05320	5283496	4446615	46821476	30377844	21757742	35705840	10750252	17589632	39878220	2064266	1408693	919983	11565728	61781620	2904147	18292876	36191528	2195245	2271456
		1-palmitoyl-2-oleoyl-GPG (16:0/18:1)	3206	766.559			5283509	4446626	7472854	5521302	4440129	8.35272e+06	2783755	2370956	4970135	354194	.	.	2875078	13407849	.	4814387	6760021	485770	.
		1-palmitoyl-2-oleoyl-GPI (16:0/18:1)*	3140	854.575		HMDB09783	.	24767668	36060304	31934428	13674169	17903640	7407639	4055815	37663700	2338599	2970541	2636273	18640364	71162912	1560341	29356700	46562996	2641461	3.58604e+06
		1-palmitoyl-2-palmitoleoyl-GPC (16:0/16:1)*	2160	732.554		HMDB07969	.	.	26635188	22268528	13285294	15587368	2675278	7012524	22591708	.	1164779	474659	3359623	39914212	39371872	15454099	23912230	272600	1196095
		1-palmitoyl-2-stearoyl-GPC (16:0/18:0)	2653	762.601		HMDB07970	.	24766643	854415	585712	511697	185796	.	144514	1130695	.	.	.	77391	682085	1996825	.	283560	.	.
		1-stearoyl-2-oleoyl-GPC (18:0/18:1)	2644	788.616		HMDB08038	.	24766704	24257900	17811758	9415136	14248233	2750241	5329163	18393944	314862	616150	385026	3313271	28049220	12698335	12466063	12164083	152157	1399445
		1-stearoyl-2-oleoyl-GPE (18:0/18:1)	2858	746.569		HMDB08993	.	.	1931272	940815	508209	1005222	.	435452	1312513	.	.	.	171882	1579671	1612332	983676	1066082	.	.
	Sphingolipid	N-palmitoyl-sphinganine (d18:0/16:0)	3090	540.535		HMDB11760	5283572	4446685	360076	365780	857101	116713	1354094	538798	408510	984456	376779	.	566598	748096	.	1373550	261523	.	142467
		phytosphingosine	1367	318.3	C12144	HMDB04610	122121	21238683	30992152	30206064	49424612	31041386	44344908	23100902	34197620	29286536	28137890	24548824	64706392	41452744	29053128	162732720	48433112	36810956	17356576
		sphinganine	1413	302.305	C00836	HMDB00269	3126	3014	2607909	2897653	6.19676e+06	3967943	43301980	3.29018e+06	3.37365e+06	14854047	2440041	1534834	55398212	6090535	8719074	44560008	7860878	5867816	685797
	Sterols	beta-sitosterol	3054	397.383	C01753	HMDB00852	222284	192962	5.11718e+06	5848319	5.6347e+06	5036070	3982987	1940603	4808535	4669768	3318910	3049791	5738206	5.64384e+06	2471286	4084456	5683934	4031571	2367304
		campesterol	2873	383.367	C01789	HMDB02869	173183	151215	3052873	3355237	2165485	2324822	1.82475e+06	838644	2322635	1691138	1612179	1667388	3.00587e+06	3746981	1196332	2631643	3849830	3.82065e+06	891591
		stigmasterol	2875	395.367	C05442	HMDB00937	5280794	4444352	2183488	1443655	2561606	3330358	3.69662e+06	1134607	2606239	1639101	1226902	1544291	4.00413e+06	5196681	913845	1642125	1445766	1489525	1093017
Nucleotide	Purine metabolism	1-methyladenine	2133	150.077	C02216	HMDB11599	78821	71157	4809702	3.3467e+06	2.03406e+06	2330281	1750444	1588169	2425192	10142022	2116151	2856868	17740656	28585592	2361723	3077811	13605863	2286236	6616624
		2'-deoxyadenosine	2252	252.109	C00559	HMDB00101	13730	13135	2188850	1273935	1297461	1561611	722117	516853	1308078	5213667	1212799	1291701	2892298	.	830430	937790	5661804	621065	1685706
		2'-deoxyguanosine	1751	266.089	C00330	HMDB00085	187790	163230	138233	137855	94541	178040	109137	54123	164327	262224	88437	52848	219418	64467	126807	116981	194484	123623	292227
		7-methylguanine	1729.7	164.058	C02242	HMDB00897	11361	10883	32574	73185	.	.	.	.	58882	24867	.	117323	.	36115	.	19186	.	.	151947
		adenine	2221	136.062	C00147	HMDB00034	190	185	34305788	55972968	15797336	39133304	21555644	3832750	20265958	54747800	64208740	41827504	17800172	37427256	33862420	35340256	23712342	25013644	45723232
		adenosine	2169	268.104	C00212	HMDB00050	60961	54923	203214080	177893104	209148080	208677776	241124784	169225760	142263536	176882272	176703856	109253672	304861888	153282592	226560432	140554800	218721856	232038176	97842208
		adenosine 2'-monophosphate (2'-AMP)	1497.7	346.056	C00946	HMDB11617	94136	.	24910	40882	137319	95695	81231	.	.	139029	.	.	111176	.	90229	24075	10776	80298	.
		adenosine 3'-monophosphate (3'-AMP)	1245	346.056	C01367	HMDB03540	41211	10463793	40220	66829	117550	31239	.	.	44020	54402	.	.	.	.	49951	68878	.	27884	75917
		adenosine 5'-monophosphate (AMP)	1013	348.07	C00020	HMDB00045	6083	10239183	5311053	7140137	1835233	3058462	3346993	.	3.69908e+06	748981	1460614	990571	7.60189e+06	31226420	1792487	5720198	4440343	2633586	1232040
		adenosine-2',3'-cyclic monophosphate	1793	328.045	C02353	HMDB11616	2024	1947	185500	478253	267291	139140	47379	50163	151109	325957	.	23615	171271	12495	302884	118305	16814	144481	286173
		allantoic acid	2960	175.047	C00499	HMDB01209	203	198	238440	160083	1388952	436653	169362	182376	151967	587813	196760	.	1.02022e+06	561186	194315	161021	383288	174677	33333
		allantoin	1672	157.037	C02350	HMDB00462	204	199	56342688	42946120	56986240	72106480	71353152	38374252	30988386	67844992	40309360	23604068	92763096	81121448	66526200	35415160	83438264	57635672	22699772
		guanine	2032	152.057	C00242	HMDB00132	764	744	10675008	12441052	14536047	17708996	14410732	11778024	9379560	47040064	22259632	20351720	16828636	6334666	10225806	33466200	6006854	6198509	59812408
		guanosine	1728	284.099	C00387	HMDB00133	6802	6544	15700264	14869887	16142541	16640439	17932924	10585121	13778959	15134120	7579235	6056526	17856424	12171516	20678532	14194133	8.37268e+06	16913678	15566616
		guanosine-2',3'-cyclic monophosphate	1480	344.04	C06194	HMDB11629	92823	369712	484896	1315408	803978	364623	235659	177953	712029	1205201	24866	38029	428366	85755	833524	650667	72946	467228	748751
		hypoxanthine	1295	137.046	C00262	HMDB00157	790	768	25773712	14128499	18101492	23553300	17357368	6902384	19108634	49391328	25573328	20950556	9394107	6708930	10509666	15204603	11391565	7354264	105740608
		inosine	1602.1	267.074	C00294	HMDB00195	6021	21241953	1153855	1190991	1094440	2273635	2501562	919939	480844	2026089	941925	704789	2398072	828534	1271293	859131	1279682	1665968	974954
		N6-carbamoylthreonyladenosine	2164	411.127		HMDB41623	161466	141829	.	.	74027	64877	79199	46598	111733	59929	37950	37750	.	21390	78891	22751	26071	44040	94271
		N6-succinyladenosine	980	382.1		HMDB00912	165243	.	234915	241049	172283	157827	71241	90637	203348	396810	159008	145234	345524	267718	106768	171379	124809	190710	90199
		urate	757.1	167.021	C00366	HMDB00289	1175	.	1911416	1127327	.	.	.	.	1192272	.	6601183	2824596	.	189567	.	48577	139552	.	85744488
		xanthine	1032	153.041	C00385	HMDB00292	1188	1151	8192660	3.95596e+06	3479895	2577103	2801670	924297	5387110	9779843	5029821	5875512	2424469	3309893	1144780	5616165	3918090	1470678	26243548
		xanthosine	1075	283.068	C01762	HMDB00299	64959	58484	132181	114136	.	.	43542	20176	78588	136979	40373	.	331155	282995	48041	61827	170052	121914	20502
	Pyrimidine metabolism	2'-deoxycytidine	2193	228.098	C00881	HMDB00014	13711	13117	236870	305313	587753	844707	857528	295645	532204	2724998	898540	442782	549814	158002	1265801	673715	1038101	1060209	1078143
		3-ureidopropionate	875	133.061	C02642	HMDB00026	111	109	135486	88041	223826	.	267029	252354	504686	196744	148917	.	188496	154555	87383	107536	70550	.	222384
		5-methyluridine (ribothymidine)	1778.1	257.078		HMDB00884	445408	393058	77218	57196	40157	51348	14212	.	62832	175231	.	24539	77052	63165	20444	.	.	142600	24482
		beta-alanine	1905	90.055	C00099	HMDB00056	239	234	7371315	6099705	5685787	5095119	6507253	3248679	7.94225e+06	9020890	2683345	4317041	10443853	11594982	5465459	6.70851e+06	7.6049e+06	6858742	4506053
		cytidine	2124	244.093	C00475	HMDB00089	6175	5940	8674184	8142159	13963372	12695199	10662073	5400593	12584354	23311616	7327027	4.10075e+06	19471614	11721646	12511080	6686625	10330888	12900969	7.02338e+06
		cytidine 2',3'-cyclic monophosphate	769	306.049	C02354	HMDB11691	417654	369711	62982	339979	.	174297	.	.	.	443792	.	.	176717	.	338061	.	.	148415	354065
		cytidine 5'-monophosphate (5'-CMP)	835	324.059	C00055	HMDB00095	6131	5414497	366932	511363	564741	720033	369338	.	425445	208196	.	.	779274	673916	426310	164106	443995	287544	.
		cytosine	2060	112.05	C00380	HMDB00630	597	577	3174204	2883050	5148482	8200513	7013163	3092883	4168865	5027416	4278533	4137609	4555826	6185048	7097738	3936155	4229779	6037385	12445170
		ectoine	1980	143.082	C06231		126041	112069	5189639	4432408	66225144	3589781	3114795	2502882	18771726	11805821	3242398	106880624	1577919	5351860	3490110	559208	762791	5896559	1741714
		orotate	1638.1	155.01	C00295	HMDB00226	967	942	1227072	1.30071e+06	677093	1088046	3415143	1009765	2169883	4048555	4187529	1913402	1310865	1132086	823320	1256873	622432	472143	1523881
		orotidine	2250	287.052		HMDB00788	92751	83729	.	27055	45118	86998	.	20167	37246	55998	44817	.	53993	.	63235	.	97498	82051	82193
		pseudouridine	1100	243.062	C02067	HMDB00767	15047	21403010	185377	169856	126743	215597	264091	49973	465204	266695	149721	144717	1143099	560981	114019	597405	167461	151542	281715
		thymidine	1963.7	241.083	C00214	HMDB00273	5789	5585	204432	246496	141043	164785	99395	107226	197853	231100	70120	185964	229126	88015	107745	69394	115596	155904	333173
		uracil	827	113.035	C00106	HMDB00300	1174	1141	1.02418e+06	695738	848683	836090	568464	649178	1497621	1567968	830334	948831	667265	911596	670764	828611	599975	547537	805803
		uridine	1431	289.068	C00299	HMDB00296	6029	5807	10692267	9650115	5269988	9218347	9523440	5119709	4327888	14638850	6613146	6209336	12346649	10124984	8592811	7722937	8502822	8489993	5460535
		uridine 5'-monophosphate (UMP)	590	325.043	C00105	HMDB00288	6030	1399139	205130	309001	329007	459121	716003	.	146950	122510	.	.	623201	1886477	142377	155891	127315	120007	.
		uridine-2',3'-cyclic monophosphate	1090	305.018	C02355	HMDB11640	439715	3824355	92214	221941	235958	147625	47607	.	89330	277319	.	.	175780	.	207677	65229	13111	119266	108695
Peptide	Dipeptide	alanylleucine	3055	203.139		HMDB28691	259583	227831	.	.	1104575	692152	1.69757e+06	118700	.	985974	.	.	766096	.	753349	406691	107420	852291	.
		glycylleucine	3059	189.123	C02155	HMDB00759	92843	83812	.	.	638822	420904	880770	.	.	451560	.	.	424232	.	352488	154943	313125	342331	.
		isoleucylglycine	2719	189.123		HMDB28907	342532	303621	.	.	1709639	908772	2373910	123577	276737	1856479	.	.	1085006	.	1488751	610733	626761	1162080	87122
		leucylalanine	2801	203.139		HMDB28922	259321	227625	.	.	534869	235823	992065	.	.	542189	.	.	500262	.	467682	289220	.	617636	.
		leucylglutamine*	2620	260.161		HMDB28927	4305457	3511125	.	.	306580	257291	854565	.	.	430847	.	.	266012	.	572682	273870	.	474901	.
		leucylglycine	2778	189.123		HMDB28929	79070	71402	.	.	594021	613057	1444279	75855	.	567478	.	.	491081	.	713295	392234	115193	587673	.
		prolylglycine	2136	173.092		HMDB11178	6426709	4932143	.	.	789606	515073	691529	177526	395413	832789	156744	221992	494092	.	526686	246775	344707	570876	212654
		threonylphenylalanine	2322	265.119		HMDB29068	4099799	3313819	.	.	94839	70598	160249	.	.	124200	.	.	128172	.	107148	.	.	100862	.
		valylglutamine	2295	246.145		HMDB29125	5253209	4419671	.	.	1109678	355948	1094553	255217	179752	687418	.	.	499020	203124	594439	197014	327021	648841	.
		valylglycine	2444	175.108		HMDB29127	136487	120256	.	183404	1841456	2042324	4073301	387995	.	2855350	.	.	2732905	.	4371939	1970050	501707	4568383	.
		valylleucine	3138	231.17		HMDB29131	352039	312586	.	170082	1.93512e+06	1362067	2157316	351876	.	1436108	.	.	1353724	.	1448056	667997	355241	1233004	.
Secondary metabolism	Benzenoids	2,4,6-trihydroxybenzoate	1574	169.014		HMDB29649	66520	59891	695287	1222855	33172	23341	29206	35212	.	21004	477860	2265982	63393	49825	57803	7643461	376238	314460	1082929
		3,4-dihydroxybenzoate	729	153.019	C00230	HMDB01856	72	71	201463	169544	188497	132714	292743	75137	116670	.	11659070	41891664	.	.	.	118241664	8.00952e+06	.	1176156
		4-hydroxybenzoate	1305	137.024	C00156	HMDB00500	135	132	3170751	3174802	966412	2881363	1651092	1311910	1556200	2533037	1516685	5775574	3037963	2996137	2029120	1045556	1236254	2031419	15139153
		gentisic acid-5-glucoside	1434	315.072			10914066	9089323	573457	418551	254935	196886	179576	80086	427162	319663	164898	151728	661944	455428	232814	2777198	653034	901782	711362
		hydroquinone beta-D-glucopyranoside	1520	271.082	C06186	HMDB29943	346	339	160598	161402	120255	80290	73413	48513	34724	84390	43204	43845	134153	77684	84023	120720	119976	149770	547276
		salicylate	802	137.024	C00805	HMDB01895	338	331	10597968	14020284	9767424	13950753	5998846	3.96695e+06	25830200	19232388	9925218	8.01241e+06	25840836	15909835	12060386	13198106	6760513	11718431	12668093
	Flavonoids	apigenin	3845.4	269.046	C01477	HMDB02124	5280443	4444100	.	61084	355390	232171	109593	76972	212853	310633	105693	636383	49107	.	134838	122945	148757	4841398	19570648
		catechin	2429	289.072	C06562	HMDB02780	9064	8711	.	.	50326	.	.	.	.	121684	10764372	5993397	.	.	.	.	29945662	.	.
		chrysoeriol	3870	299.056	C04293	HMDB30667	5280666	4444263	267069	372127	636270	524207	287455	300329	250928	778962	387167	1429284	341220	102315	227120	2367260	460790	2738757	8110654
		cyanidin glucoside	2808	449.108	C08604	HMDB30684	441667	.	.	.	.	.	.	.	.	.	.	.	.	.	.	654986432	880286	.	.
		dihydroquercetin	2198	303.051	C12316		471	458	314166	487332	.	.	18268	.	.	.	1881598	3190796	.	.	.	6063157	1565290	.	56613
	Phenylpropanoids	4-hydroxycinnamate	1457	163.04	C00811	HMDB02035	637542	553148	3783273	5.43567e+06	2481915	2.72898e+06	2380350	1.6422e+06	2402530	2466102	1615444	1157179	3446135	4367319	4699951	1462322	1388461	3399861	12375759
		caffeate	1165	179.035	C01197	HMDB01964	689043	600426	290903	235058	50724	41717	2450597	.	469370	19781	1317435	368310	.	.	477148	710140	769822	1204578	11664582
		coniferyl aldehyde	3416	177.056	C02666		5280536	4444167	116373	283798	51739	56996	.	789146	68521	66866	.	64610	.	125128	115676	.	.	305474	10444733
		dihydroferulic acid	1928	195.066			14340	13701	.	25132	.	.	97095	10683	.	31110	.	51464	23190	15914	.	122377	33615	.	111959
		ferulate	1755	193.051	C01494	HMDB00954	445858	393368	5039385	3252724	5680154	4159235	6672897	2026265	3223838	9742948	3417276	2901544	4923455	2176923	14896614	3799279	3291977	8024054	5176121
		p-coumaroylserotonin	3700	321.125		HMDB38340	5458879	4572762	66661	104122	16578	20555	51808	18029	.	136577	838567	145355	98993	116641	118790	2072840	1612835	37848	1007271
		sinapate	1973	223.061	C00482	HMDB32616	637775	553361	942291	477221	727065	242031	1539720	179643	660706	65115	402304	746307	285341	189801	171905	575981	679372	536481	306894
		syringic acid	1450	197.046	C10833	HMDB02085	10742	10289	372969	258226	151758	208475	193164	133184	329842	413807	192922	522839	257005	195866	194376	256709	127428	239871	771880
		vanillate	1100	167.035	C06672	HMDB00484	8468	8155	1183451	1286117	634028	1265721	1051229	850238	910993	1366164	663225	805658	779946	696369	1.00668e+06	9476547	334053	927228	4861524
		vanillin	2311.9	151.04	C00755	HMDB12308	1183	13860434	481061	836908	.	1021176	722642	1707715	.	262272	.	725702	.	1117735	.	.	245945	.	6359118
	Terpenoids	3-hydroxy-3-methylglutarate	2850	161.046	C03761	HMDB00355	1662	4573695	18398650	21689352	13652401	18721264	29190660	6551797	42263892	38674280	14223175	30379836	34480792	27743846	27726940	20302692	18907000	14946873	27098146
		abscisate	3170	263.129	C06082	HMDB35140	5280896	4444418	132306	118487	83466	162466	72071	91819	49454	103875	58943	107671	308117	172722	64524	146373	119755	77175	207523

## Sheet: Supplementary Table 2
Supplementary Table 2. Z-scores of 71 significant metabolites
	-2	Blue: indicates significant lower Z-score for that metabolite (Z < -2.00)
	-1.5	Light Blue: indicates a trend towards significant lower Z-score for that metabolite (-1.50 < Z < -2.00)
	2	Red: indicates significant higher Z-score for that metabolite (Z > 2.00)
	1.5	Light Red: indicates a trend towards significant lower Z-score for that metabolite (1.50 > Z > 2.00)
	1.2	Non-colored text and cell: mean values are not significant for that metabolite
	Values presented are Z-scores. Significantly increased Z-scores are highlighted in red andsignificantly decreased Z-scores are highlighted in blue. Light blue and light red coloring represents metabolites that showed trends towards significance ( < Z-score < 0.10).
Data from z-scores + Pathway Enrichment Scores							Fold of Change
Super Pathway	Sub Pathway	Biochemical Name	KEGG	HMDB	PUBCHEM	CHEMSPIDER	Kenya- Basmati 217	Kenya - Basmati 370	Mali - Gambiaka	Mali - Shwetasoke	Mali - DM-16	Mali - Khao Gaew	Nicaragua - Dorado	Nepal – Sawa Mahsuli	India - Chennula	India - Njavara	USA - Calrose	USA - RBT300	USA - Jasmine 85	USA - IAC 600	USA – LTH	USA – SHZ-2	Cambodia - Rang Jey
Amino acid	Aromatic amino acid metabolism (PEP derived)	quinate	C00296	HMDB03072	6508	10246715	0.3473	0.479	-0.7705	0.3954	-2.1748	-0.4568	0.177	-1.1162	-0.2432	1.381	1.6179	1.4442	-0.6099	0.2984	-0.2526	-1.0815	0.5654
		serotonin	C00780	HMDB00259	5202	5013	0.097	-0.0635	0.3374	0.1634	2.2391	-0.0521	-0.991	-1.4357	-0.6347	-2.0575	0.3233	0.9041	-0.6956	1.1688	0.5874	0.1719	-0.0623
		tryptophan	C00078	HMDB00929	6305	6066	0.8095	0.5452	0.0682	0.8221	0.6546	-1.7884	0.5505	-0.2899	-0.4771	-1.7108	0.7308	0.998	-0.6172	0.3747	0.8274	0.5437	-2.0413
		tyrosine	C00082	HMDB00158	6057	5833	-0.2024	-0.39	0.6618	0.4834	0.6924	-1.1941	0.7073	0.5618	-1.2339	-1.1352	0.9136	0.6075	0.4171	-0.0794	0.9079	0.8615	-2.5793
	Aspartate family (OAA derived)	asparagine	C00152	HMDB00168	6267	6031	0.3053	0.1989	1.7335	1.2772	0.2406	-0.3167	-0.3009	0.5113	-0.8454	-2.4417	0.8487	0.2197	0.1817	-0.8894	-0.073	0.7324	-1.382
		aspartate	C00049	HMDB00191	5960	5745	-0.1822	-0.3763	0.1934	0.4619	1.3727	-0.018	-0.4199	0.3087	-0.7819	-1.5342	1.2641	1.0602	0.6642	-2.3582	0.6686	0.6227	-0.9456
		lysine	C00047	HMDB00182	5962	5747	-0.1742	-0.7601	1.1628	0.2413	0.8992	-1.0587	0.6149	1.0815	-2.2674	-0.4174	0.6746	0.7856	0.1502	-0.883	-0.2588	1.3748	-1.1653
		methionine sulfoxide	C02989	HMDB02005	158980	139840	-0.6318	-0.2489	-0.5449	-0.5218	0.0997	-2.5269	-0.0022	1.1474	-0.4047	0.0326	1.3413	0.0323	0.8846	-0.9836	1.286	1.3413	-0.3002
		N6,N6,N6-trimethyllysine	C03793	HMDB01325	440120	140379	0.7751	0.0932	0.0186	-0.0799	0.4858	-0.6422	-0.3271	0.5436	-2.3333	-1.2197	1.9474	1.632	-0.1865	0.1668	-0.3569	0.2989	-0.8159
		pipecolate	C00408	HMDB00070	849	826	0.4834	-0.4724	0.5612	0.1397	1.1909	-0.9084	0.5563	2.0476	-1.1243	-1.5602	0.5542	0.4781	-1.537	-0.5582	0.1623	-0.8809	0.8676
		threonine	C00188	HMDB00167	6288	6051	0.4155	-0.1347	0.3704	0.4411	0.5895	-1.4766	0.5866	1.3628	-2.0552	-1.3775	0.7974	0.8306	0.3815	-0.0356	0.7061	0.2137	-1.6156
	Glutamate family (alpha-ketoglutarate derived)	arginine	C00062	HMDB00517	232	227	-0.1893	-0.8273	1.2878	0.3378	0.4587	-1.413	-0.2315	0.5385	-2.0105	-0.9338	1.638	1.4323	-0.208	-0.461	-0.0935	0.9762	-0.3014
		glutamate	C00025	HMDB00148	611	591	0.2936	0.0908	0.7384	0.7567	0.6463	-0.4989	-0.6497	0.145	-1.1007	-2.6374	1.0631	1.3233	0.7016	-0.6269	0.2692	0.6202	-1.1345
		glutamine	C00064	HMDB00641	5961	5746	-0.6194	-0.846	1.9878	0.7242	1.1178	0.2012	-0.4842	0.3348	-0.7647	-2.0864	0.947	0.8465	0.1189	-0.6729	0.1047	0.3658	-1.2749
		N-acetylglutamate	C00624	HMDB01138	70914	1266066	0.2989	0.4308	-1.2825	-0.1929	-0.6547	-0.2188	1.5311	0.0596	1.3128	2.0108	-0.6674	0.0889	-0.6398	-0.21	-1.1208	-1.6	0.8539
		N-methylproline	.	.	557	541	-0.524	-0.5535	3.3957	0.3237	0.0366	-0.5429	-0.4206	0.1627	-0.3407	-1.1119	0.3772	0.0318	-0.2079	-0.0213	0.5789	0.0037	-1.1873
		pyroglutamine*	.	.	134508	118562	0.4624	0.5452	1.0884	1.108	0.7091	0.044	-0.1457	-0.043	-1.5943	-2.4966	0.3739	0.8853	-0.3313	-0.5314	-0.171	1.1494	-1.0526
		stachydrine	C10172	HMDB04827	115244	103115	-0.2545	-0.0433	2.9411	0.3048	0.0704	-0.6146	0.7776	0.777	-1.4225	-1.2574	-0.6917	0.149	0.4688	-0.201	0.1535	-0.0584	-1.0987
		trans-4-hydroxyproline	C01157	HMDB00725	5810	5605	-0.338	-1.1636	2.5678	1.7067	-1.0049	-1.1746	0.6981	0.8078	-0.6599	-0.0215	-0.4998	-0.0357	-0.0318	0.1913	-0.0257	-0.1515	-0.8648
	Serine family (phosphoglycerate derived)	glycine	C00037	HMDB00123	750	730	0.0374	-0.2859	0.6579	-0.3643	0.0629	-1.7659	0.1138	2.1411	-1.5529	-0.8177	1.2502	0.8036	0.3108	0.3082	-0.2184	0.627	-1.3077
		taurine	C00245	HMDB00251	1123	1091	0.5273	0.3997	-0.1815	0.3492	0.3659	-1.0693	-0.03	0.5835	-0.8495	-2.847	1.0466	0.784	0.9208	-1.0367	0.6668	0.8238	-0.4537
n= 21
Carbohydrate	Amino sugar and nucleotide sugar	arabonate/xylonate	.	.	.	.	0.6322	0.7085	-1.4345	0.4669	-0.6379	-2.2793	-0.1014	0.9383	0.2067	1.7371	0.8129	0.0815	0.3494	-1.2441	-0.1527	-0.7146	0.6311
		erythritol	C00503	HMDB02994	222285	13835932	2.775	0.7612	1.131	-0.267	-0.6372	-1.1926	0.7345	0.057	-1.0408	0.337	-0.7778	-0.7454	-0.7712	0.6379	-0.2328	-0.7648	-0.0043
		glucosaminate	C03752	.	73563	66245	0.0097	0.0742	1.0555	-0.4265	0.0223	-1.8447	1.5742	0.7433	0.5454	-2.0853	-0.0805	0.2089	-0.0956	0.7747	0.1372	0.8667	-1.4795
		ribonate	C01685	HMDB00867	5460677	4574162	0.5071	0.4536	-0.8296	0.0536	-1.2865	-2.1974	0.7368	1.668	-0.1548	0.9975	-0.41	-0.1577	-0.1966	1.7104	0.1389	-0.9091	-0.1241
	TCA cycle	aconitate [cis or trans]	.	.	.	.	0.045	0.163	0.2838	-0.3798	-0.0421	-1.5556	0.2962	1.5323	-0.4874	-2.2957	1.388	-1.2016	0.6769	0.3745	0.7848	0.8045	-0.3869
		alpha-ketoglutarate	C00026	HMDB00208	51	50	0.4098	-0.03	0.8292	1.2342	0.6814	0.0585	-0.3952	0.4524	-1.4184	-2.1028	1.385	-0.4878	0.793	-0.9391	-0.0994	0.9576	-1.3284
		malate	C00149	HMDB00156	525	510	0.1964	0.3476	-0.0698	0.367	-0.1905	0.3837	0.1678	0.5511	-0.8947	-0.5287	2.1234	1.3942	-0.6046	-2.144	-1.034	-0.9326	0.8675
n= 7
Cofactors & vitamins	Tocopherol metabolism	gamma-tocopherol/beta-tocopherol	.	.	.	.	1.1085	0.7622	0.352	-0.7185	0.868	0.6156	0.5246	-2.0725	0.4664	0.7805	-0.6403	-1.8434	-1.4092	0.3524	0.9597	-0.3497	0.2435
		gamma-tocotrienol	C14155	HMDB12958	5282349	4445514	0.7412	0.4765	0.1648	-0.1524	0.6524	0.1764	1.3632	-2.7527	0.2052	0.2772	-0.6545	-1.2571	-1.021	0.8149	0.7202	0.7927	-0.5471
n= 2
Lipids	Free fatty acid	laurate (12:0)	C02679	HMDB00638	3893	3756	-0.9363	-0.4001	-0.1053	-0.5334	0.5101	-1.3882	-0.1618	0.4219	2.7244	0.9828	0.406	-1.6668	0.6151	-0.0517	-0.27	0.4166	-0.5633
		linoleate (18:2n6)	C01595	HMDB00673	5280450	4444105	0.0674	0.3244	0.7452	-0.0892	-1.1077	-0.5499	-0.2918	1.1815	-0.8353	0.3289	1.3552	-2.4578	1.1709	-0.5325	-0.6687	1.2309	0.1285
		linolenate [alpha or gamma; (18:3n3 or 6)]	C06426	HMDB03073/HMDB01388	5280934	4444437	-0.0617	0.317	0.692	-0.2665	-0.1678	-0.8202	0.2725	1.2337	-0.3991	-0.2304	1.0902	-2.9618	1.1827	-0.3204	-0.4871	1.058	-0.1311
		myristate (14:0)	C06424	HMDB00806	11005	10539	-0.4284	0.068	0.4078	-0.1818	-0.1015	-1.0145	-0.2813	1.2513	0.2666	-0.3989	1.1442	-2.8678	1.2519	0	-0.0551	1.2289	-0.2896
		myristoleate (14:1n5)	C08322	HMDB02000	5281119	4444564	-0.4131	-0.0456	-0.1295	-0.2782	1.0818	-1.1615	0.1247	0.9344	-0.0278	-0.2725	0.9882	-2.8675	1.1969	0.7343	0.0043	0.797	-0.666
		palmitate (16:0)	C00249	HMDB00220	985	960	0.249	0.5813	0.7963	0.2786	-0.4253	-0.3937	-0.7545	0.9022	-0.8054	0.3681	0.8619	-2.427	1.1031	-0.8739	-1.2904	1.3801	0.4496
		palmitoleate (16:1n7)	C08362	HMDB03229	445638	393216	-0.1687	0.1128	0.3985	0.0232	-0.3733	-0.719	-0.1169	1.2772	-0.5468	0.0943	1.1738	-2.779	1.3693	-0.4906	-0.452	1.3243	-0.127
	Glycerolipids (diacyl)	diacylglycerol (14:0/18:1, 16:0/16:1) [1]*	.	.	.	.	0.0459	0.0901	-0.1241	0.1059	1.4662	-1.2554	1.2224	0.1033	-0.7951	-1.0356	0.413	-2.1693	0.7026	1.2703	0.6109	0.5285	-1.1796
		linoleoyl-linolenoyl-glycerol (18:2/18:3) [1]*	.	HMDB07249	.	.	0.2267	0.1297	0.7395	0.3023	0.7438	-0.503	1.2591	0.4443	-0.7254	-0.2359	0.4449	-3.1906	0.0493	0.863	0.2421	0.165	-0.9549
		linoleoyl-linolenoyl-glycerol (18:2/18:3) [2]*	.	HMDB07250	.	.	0.4684	0.5807	1.0469	1.3011	0.6133	0.1223	1.251	0.0588	-1.6582	-0.1607	0.3996	-2.1354	-0.2734	0.5465	-0.3179	-0.2051	-1.6381
		linoleoyl-linoleoyl-glycerol (18:2/18:2) [1]*	.	HMDB07248	.	.	0.1431	0.4486	1.0005	0.5944	0.7284	-0.8774	1.1154	0.2502	-1.2255	-0.3914	0.8569	-2.7333	-0.1275	0.6734	0.4688	0.1857	-1.1102
		oleoyl-linoleoyl-glycerol (18:1/18:2) [1]	.	HMDB07219	.	23975985	-0.0418	0.2468	0.1185	0.1308	1.0926	-0.9114	0.9127	0.3213	-1.1715	-0.254	0.7887	-2.7297	0.6228	1.036	0.3249	0.6923	-1.1787
		oleoyl-linoleoyl-glycerol (18:1/18:2) [2]	.	HMDB07219	.	29788004	0.183	0.6516	0.7131	0.7393	1.0837	-0.0137	0.9496	0.0301	-2.1039	-0.1362	0.4974	-1.3588	-0.1338	0.8722	0.058	0.214	-2.2457
		oleoyl-oleoyl-glycerol (18:1/18:1) [1]*	.	HMDB07218	.	.	0.0908	0.4121	-0.4091	0.0931	1.1831	-0.5131	0.8813	0.2573	-0.5676	0.2943	0.5287	-2.9586	0.7864	0.7552	0.3068	0.3691	-1.5098
		oleoyl-oleoyl-glycerol (18:1/18:1) [2]*	.	HMDB07218	.	.	0.2348	0.8502	-0.2757	0.7204	1.4097	0.2527	1.0157	-0.1405	-1.2229	0.2199	0.2638	-1.5714	0.4414	0.2519	0.2609	-0.0435	-2.6672
		palmitoleoyl-linoleoyl-glycerol (16:1/18:2) [1]*	.	HMDB07132	.	.	0.3466	0.3511	0.3841	0.0666	1.1764	-0.9702	1.3569	-0.2366	-1.3166	-0.217	0.7291	-2.4493	0.2909	0.6317	0.5492	0.6649	-1.3579
		palmitoyl-linoleoyl-glycerol (16:0/18:2) [1]*	.	HMDB07103	9543695	7822645	0.9852	0.6052	1.096	0.9109	-0.5259	-0.1351	1.3728	0.2752	-0.3002	0.3241	0.1188	-0.9896	-2.2242	0.1745	0.5014	-1.9788	-0.2102
		palmitoyl-linoleoyl-glycerol (16:0/18:2) [2]*	.	HMDB07103	.	.	0.9225	0.5831	1.2197	1.0623	-0.2353	0.6023	1.0391	0.083	-0.7729	0.2505	0.1213	-0.2264	-2.5334	0.056	0.2623	-1.7217	-0.7123
		palmitoyl-oleoyl-glycerol (16:0/18:1) [2]*	C13861	HMDB07102	.	.	0.8364	0.5915	0.818	0.9916	-0.0026	0.6627	1.3154	0.2309	-0.6984	0.3354	0.1856	-0.7552	-2.2134	0.2637	0.3508	-1.9745	-0.9381
		palmitoyl-palmitoyl-glycerol (16:0/16:0) [1]*	.	HMDB07098	.	.	0.4202	0.0988	0.2663	0.4872	0.3375	-0.4498	0.7893	0.2378	-0.0484	1.064	0.8701	-1.548	-2.5844	0.6179	0.8999	-1.5316	0.0731
		palmitoyl-palmitoyl-glycerol (16:0/16:0) [2]*	.	HMDB07098	.	.	0.5544	0.4049	0.3927	0.4061	0.412	-0.3065	1.27	0.3719	-0.3064	0.7557	1.0091	-2.0871	-1.974	0.4692	0.5364	-1.6361	-0.2722
	Glycerolipids (monoacyl)	1-linoleoylglycerol (18:2)	.	.	5283469	4446589	0.1931	0.327	0.5466	0.3406	1.0461	-0.6331	1.0345	-0.125	-1.5998	-0.5343	0.6298	-2.5051	0.6796	0.8442	0.2752	0.7297	-1.2492
		1-oleoylglycerol (18:1)	.	HMDB11567	5283468	4446588	0.3068	0.4839	0.126	0.372	1.0494	-0.5293	0.969	0.0221	-1.2918	-0.3691	0.4996	-2.9043	0.7699	0.6977	0.2405	0.6366	-1.079
		1-palmitoylglycerol (16:0)	.	HMDB31074	14900	14201	0.5216	0.4382	0.397	0.2232	0.6462	-0.9084	1.3638	0.1733	-0.5489	-0.0864	0.4192	-3.2218	0.1378	0.7292	0.4035	0.0928	-0.7804
		2-oleoylglycerol (18:1)	.	HMDB11537	5319879	4478086	0.7631	0.915	0.7167	1.0408	-1.111	0.2743	0.0982	0.4435	-2.2807	-0.3536	1.0821	-0.6989	0.9846	-0.8097	-1.4136	0.806	-0.4569
	Lyso-phospholipids	1-linoleoyl-GPE (18:2)*	.	HMDB11507	52925130	21403170	1.2684	1.005	0.8695	0.0006	1.1367	0.8168	0.4772	-0.0822	-0.0308	-1.1459	0.4799	-1.2756	-0.9715	0.4168	0.1195	-0.7141	-2.3702
		1-palmitoyl-GPC (16:0)	.	HMDB10382	86554	78064	1.4674	1.0452	0.6603	-0.4511	-0.1879	0.7929	0.7135	0.8657	0.7229	0.0077	-1.0074	-1.6346	-0.0835	0.0891	0.2929	-1.167	-2.1261
		1-palmitoyl-GPE (16:0)	.	HMDB11503	9547069	7826019	1.6047	0.9958	-0.1322	-0.4164	-0.2682	1.159	0.5517	0.683	0.4117	0.1062	-0.9056	-0.9998	-0.501	0.2271	0.6291	-0.4743	-2.6707
	Oxylipins	12,13-DiHOME	C14829	HMDB04705	10236635	8412123	-0.8725	-1.0187	0.6889	0.0337	-0.0017	-0.5191	-0.9206	0.82	0.5343	1.4215	1.0345	-2.0087	0.9187	-0.0159	-0.0529	1.3351	-1.3766
		9,10-DiHOME	C14828	HMDB04704	9966640	8142232	-0.9913	-0.9887	0.566	-0.1447	-0.2667	-0.6818	-0.6675	0.4459	0.7792	1.8902	0.8009	-2.173	0.9855	0.2934	-0.3435	1.1635	-0.6675
		9,10-epoxystearate	C19418	.	15868	15081	-0.9387	0.0538	-0.1392	0.2392	0.2289	-0.9765	-0.3548	1.575	-0.3627	0.523	1.2222	-2.7884	0.9586	-0.2459	0.2623	0.8344	-0.0912
	Phospholipid Metabolism	glycerophosphoglycerol	C03274	.	439964	388990	-0.7384	-0.2049	-0.1057	-0.1082	0.9634	-1.1999	-0.3812	0.9549	-0.2565	-2.0676	1.18	-0.6255	1.7185	0.383	-0.1253	1.4329	-0.8195
		glycerophosphorylcholine (GPC)	C00670	HMDB00086	71920	571409	-0.24	0.0227	0.4057	0.1625	0.8342	-1.2465	-0.0935	-0.0209	-0.5972	-2.5391	1.0029	0.5305	1.1887	0.6132	0.2737	1.1732	-1.47
n= 33
Nucleotide	Purine metabolism	1-methyladenine	C02216	HMDB11599	78821	71157	0.1867	-0.224	-0.7879	-0.6339	-0.9579	-1.0681	-0.5887	1.0315	-0.7431	-0.4032	1.6647	2.2049	-0.6187	-0.3189	1.3642	-0.6555	0.5479
		adenine	C00147	HMDB00034	190	185	0.2657	1.0039	-0.9037	0.4642	-0.4351	-3.0394	-0.5281	0.9705	1.2109	0.5646	-0.7237	0.397	0.246	0.3105	-0.2913	-0.2107	0.6989
		adenosine	C00212	HMDB00050	60961	54923	0.407	-0.0519	0.5063	0.4985	0.997	-0.2242	-0.8227	-0.0716	-0.075	-1.7332	1.8059	-0.5654	0.7821	-0.8644	0.6607	0.8645	-2.1136
		adenosine 5'-monophosphate (AMP)	C00020	HMDB00045	6083	10239183	0.6239	0.93	-0.4753	0.053	0.1463	-1.4024	0.2497	-1.4024	-0.7115	-1.1132	0.9949	2.4564	-0.4997	0.7007	0.4387	-0.1017	-0.8875
		guanine	C00242	HMDB00132	764	744	-0.5069	-0.277	-0.0432	0.2533	-0.0563	-0.3592	-0.7012	1.7205	0.5968	0.4622	0.1767	-1.2907	-0.5715	1.2092	-1.3705	-1.3233	2.0812
		hypoxanthine	C00262	HMDB00157	790	768	0.5817	-0.2603	0.0868	0.4555	0.028	-1.2637	0.1626	1.4927	0.5708	0.2915	-0.832	-1.3035	-0.6748	-0.1575	-0.5619	-1.1749	2.559
n= 6
Secondary metabolism	Benzenoids	4-hydroxybenzoate	C00156	HMDB00500	135	132	0.466	0.4679	-1.2866	0.3248	-0.4965	-0.8357	-0.5838	0.1348	-0.6218	1.3506	0.4029	0.3824	-0.1924	-1.1705	-0.9233	-0.1907	2.772
		salicylate	C00805	HMDB01895	338	331	-0.1854	0.388	-0.3527	0.3778	-1.3516	-2.1991	1.6401	1.0357	-0.3198	-0.7585	1.6409	0.6471	0.0794	0.2642	-1.1067	0.0205	0.1802
n= 2
Total= 71
